# Supplementary material
Source: publisher figshare collection journal article supplement (https://acs.figshare.com/ndownloader/files/5198404)
Supplement: Supplementary file 1 [file 5198404]

# **Supporting Information**

## **Synthesis of Aryloxo Cyclopentadienyl Group 4 Dendrimers**

Silvia Arévalo, Ernesto de Jesús, F. Javier de la Mata\*, Juan C. Flores, Rafael

Gómez\*, M<sup>a</sup> Pilar Gómez-Sal, Paula Ortega and Susana Vigo

*Departamento de Química Inorgánica, Universidad de Alcalá, Campus Universitario,  
E-28871 Alcalá de Henares, Spain*

## Experimental Section

### Synthesis of $[\text{Ti}(\text{C}_5\text{Me}_5)\text{Cl}_2\{\text{O}[\text{C}_6\text{H}_3(\text{OMe})(\text{CH}_2\text{-CH=CH}_2)\}]]$ (**1**)

A solution of eugenol (0.40 g, 2.43 mmol), in  $\text{CH}_2\text{Cl}_2$  (10 mL) was slowly added to a solution of  $[\text{Ti}(\text{C}_5\text{Me}_5)\text{Cl}_2\text{Me}]$  (0.65 g, 2.43 mmol) in  $\text{CH}_2\text{Cl}_2$  (5 mL). The mixture was stirred overnight at room temperature. The solvent was removed at reduced pressure affording a red solid. The product was extracted with hexane at 0 °C (5 mL). The resulting hexane solution was evaporated to dryness, giving **1** as a red solid (0.94 g, 93%).  $^1\text{H-NMR}(\text{CDCl}_3)$ :  $\delta$  6.90 (m, 1H,  $\text{C}_6\text{H}_3$ ), 6.69-6.62 (m, 2H,  $\text{C}_6\text{H}_3$ ), 5.87 (m, 1H,  $\text{CH}_2\text{-CH=CH}_2$ ), 5.04 (m, 2H,  $\text{CH}_2\text{-CH=CH}_2$ ), 3.80 (s, 3H, OMe), 3.33 (m, 2H,  $\text{CH}_2\text{-CH=CH}_2$ ), 2.18 (s, 15H,  $\text{C}_5\text{Me}_5$ ).  $^{13}\text{C-NMR}(\text{CDCl}_3)$ :  $\delta$  153.6 ( $\text{C}_{\text{ipso}}$  bonded to -OTi), 150.0 ( $\text{C}_{\text{ipso}}$  bonded to -OMe), 137.4 ( $\text{CH}_2\text{-CH=CH}_2$ ), 135.7 ( $\text{C}_{\text{ipso}}$  bonded to - $\text{C}_3\text{H}_5$ ), 132.7 ( $\text{C}_5\text{Me}_5$ ), 120.8, 120.3, 113.1 ( $\text{C}_6\text{H}_3$ ), 115.8 ( $\text{CH}_2\text{-CH=CH}_2$ ), 56.3 (OMe), 40.0 ( $\text{CH}_2\text{-CH=CH}_2$ ), 12.7 ( $\text{C}_5\text{Me}_5$ ). Anal. Calcd for  $\text{C}_{20}\text{H}_{26}\text{Cl}_2\text{O}_2\text{Ti}$ : C, 57.57; H, 6.24. Found: C, 57.09; H, 6.02.

### Synthesis of $[\text{Ti}(\text{C}_5\text{Me}_5)\text{Cl}_2\{\text{O}[\text{C}_6\text{H}_2(\text{OMe})_2(\text{CH}_2\text{-CH=CH}_2)\}]]$ (**2**)

A solution of 4-allyl-2,6-dimethoxyphenol (0.36 g, 1.85 mmol) in  $\text{Et}_2\text{O}$  (10 mL) was slowly added to a solution of  $[\text{Ti}(\text{C}_5\text{Me}_5)\text{Cl}_2\text{Me}]$  (0.50 g, 1.85 mmol) in  $\text{Et}_2\text{O}$  (5 mL). The mixture was stirred overnight at room temperature. A red solid precipitated. The solution was filtered off and the solid was dried under vacuum affording **2** as a red microcrystalline solid (0.66 g, 80%). Red crystals were obtained from a mixture  $\text{Et}_2\text{O}$ /hexane.  $^1\text{H-NMR}(\text{CDCl}_3)$ :  $\delta$  6.35 (s, 2H,  $\text{C}_6\text{H}_2$ ), 5.95 (m, 1H,  $\text{CH}_2\text{-CH=CH}_2$ ), 5.05 (m, 2H,  $\text{CH}_2\text{-CH=CH}_2$ ), 3.78 (s, 6H, OMe), 3.32 (m, 2H,  $\text{CH}_2\text{-CH=CH}_2$ ), 2.15 (s, 15H,  $\text{C}_5\text{Me}_5$ ).  $^{13}\text{C-NMR}(\text{CDCl}_3)$ :  $\delta$  151.3 ( $\text{C}_{\text{ipso}}$  bonded to -OMe), 144.0 ( $\text{C}_{\text{ipso}}$  bonded to -OTi), 137.2 ( $\text{CH}_2\text{-CH=CH}_2$ ), 134.8 ( $\text{C}_{\text{ipso}}$  bonded to - $\text{C}_3\text{H}_5$ ), 132.3 ( $\text{C}_5\text{Me}_5$ ), 116.0 ( $\text{CH}_2\text{-$

CH=CH<sub>2</sub>), 106.1 (C<sub>6</sub>H<sub>2</sub>), 56.7 (OMe), 40.5 (CH<sub>2</sub>-CH=CH<sub>2</sub>), 12.6 (C<sub>5</sub>Me<sub>5</sub>). Anal. Calcd for C<sub>21</sub>H<sub>28</sub>Cl<sub>2</sub>O<sub>3</sub>Ti: C, 56.40; H, 6.31. Found: C, 56.79; H, 6.30.

### Synthesis of [Ti(C<sub>5</sub>Me<sub>5</sub>)Cl<sub>2</sub>{O[C<sub>6</sub>H<sub>3</sub>(OMe)(CH<sub>2</sub>CH<sub>2</sub>CH<sub>2</sub>SiEt<sub>3</sub>)]}] (3)

A solution of [HO{C<sub>6</sub>H<sub>3</sub>(OMe)(CH<sub>2</sub>CH<sub>2</sub>CH<sub>2</sub>SiEt<sub>3</sub>)] (0.40 g, 1.43 mmol) in CH<sub>2</sub>Cl<sub>2</sub> (10 mL) was slowly added to a solution of [Ti(C<sub>5</sub>Me<sub>5</sub>)Cl<sub>2</sub>Me] (0.38 g, 1.43 mmol) in CH<sub>2</sub>Cl<sub>2</sub> (5 mL). The mixture was stirred overnight at room temperature. The solvent was removed at reduced pressure affording a red oil. The product was extracted with hexane at 0 °C (5 mL). The resulting hexane solution was evaporated to dryness, affording **3** as an oily red compound (0.68 g, 90%). <sup>1</sup>H-NMR(CDCl<sub>3</sub>): δ 6.89 (m, 1H, C<sub>6</sub>H<sub>3</sub>), 6.64 (m, 2H, C<sub>6</sub>H<sub>3</sub>), 3.81 (s, 3H, OMe). 2.56 (m, 2H, SiCH<sub>2</sub>CH<sub>2</sub>CH<sub>2</sub>Ph), 2.19 (s, 15H, C<sub>5</sub>Me<sub>5</sub>), 1.58 (m, 2H, SiCH<sub>2</sub>CH<sub>2</sub>CH<sub>2</sub>Ph), 0.90(t, 9H, SiCH<sub>2</sub>CH<sub>3</sub>), 0.51 (m, 8H, SiCH<sub>2</sub>CH<sub>3</sub> and SiCH<sub>2</sub>CH<sub>2</sub>CH<sub>2</sub>Ph overlapping). <sup>13</sup>C-NMR(CDCl<sub>3</sub>): δ 152.3 (C<sub>ipso</sub> bonded to -OTi), 149.8 (C<sub>ipso</sub> bonded to -OMe), 138.5 (C<sub>ipso</sub> bonded to -CH<sub>2</sub>), 132.5 (C<sub>5</sub>Me<sub>5</sub>), 120.7, 120.1, 113.0 (C<sub>6</sub>H<sub>3</sub>), 56.4 (OMe), 40.0 (SiCH<sub>2</sub>CH<sub>2</sub>CH<sub>2</sub>Ph), 26.0 (SiCH<sub>2</sub>CH<sub>2</sub>CH<sub>2</sub>Ph), 12.8 (C<sub>5</sub>Me<sub>5</sub>), 11.1 (SiCH<sub>2</sub>CH<sub>2</sub>CH<sub>2</sub>Ph), 7.5(SiCH<sub>2</sub>CH<sub>3</sub>), 3.3 (SiCH<sub>2</sub>CH<sub>3</sub>). Anal. Calcd for C<sub>26</sub>H<sub>42</sub>Cl<sub>2</sub>O<sub>2</sub>SiTi: C, 58.54; H, 7.94. Found: C, 58.25; H, 7.81.

### Synthesis of [Ti(C<sub>5</sub>Me<sub>5</sub>)Cl<sub>2</sub>{O[C<sub>6</sub>H<sub>2</sub>(OMe)<sub>2</sub>(CH<sub>2</sub>CH<sub>2</sub>CH<sub>2</sub>SiEt<sub>3</sub>)]}] (4)

A solution of {HO[C<sub>6</sub>H<sub>2</sub>(OMe)<sub>2</sub>(CH<sub>2</sub>CH<sub>2</sub>CH<sub>2</sub>SiEt<sub>3</sub>)]} (0.40 g, 1.29 mmol) in CH<sub>2</sub>Cl<sub>2</sub> (10 mL) was slowly added to a solution of [Ti(C<sub>5</sub>Me<sub>5</sub>)Cl<sub>2</sub>Me] (0.35 g, 1.29 mmol) in CH<sub>2</sub>Cl<sub>2</sub> (5 mL). The mixture was stirred overnight at room temperature. The solvent was removed at reduced pressure, affording a red solid. The product was washed with hexane (2x3 mL), to give **4** as a red microcrystalline solid (0.65 g, 90%). <sup>1</sup>H-NMR(CDCl<sub>3</sub>): δ 6.34 (s, 2H, C<sub>6</sub>H<sub>2</sub>), 3.79 (s, 6H, OMe). 2.54 (m, 2H, SiCH<sub>2</sub>CH<sub>2</sub>CH<sub>2</sub>Ph), 2.15 (s, 15H, C<sub>5</sub>Me<sub>5</sub>), 1.56 (m, 2H, SiCH<sub>2</sub>CH<sub>2</sub>CH<sub>2</sub>Ph), 0.90(t, 9H, SiCH<sub>2</sub>CH<sub>3</sub>), 0.49 (m, 8H, SiCH<sub>2</sub>CH<sub>3</sub> and SiCH<sub>2</sub>CH<sub>2</sub>CH<sub>2</sub>Ph overlapping). <sup>13</sup>C-NMR(CDCl<sub>3</sub>): δ 151.2

(C<sub>ipso</sub> bonded to -OMe), 144.0 (C<sub>ipso</sub> bonded to -OTi), 137.7 (C<sub>ipso</sub> bonded to -CH<sub>2</sub>), 132.2 (C<sub>5</sub>Me<sub>5</sub>), 106.2 (C<sub>6</sub>H<sub>3</sub>), 56.8 (OMe), 40.4 (SiCH<sub>2</sub>CH<sub>2</sub>CH<sub>2</sub>Ph), 25.8 (SiCH<sub>2</sub>CH<sub>2</sub>CH<sub>2</sub>Ph), 12.6 (C<sub>5</sub>Me<sub>5</sub>), 11.0 (SiCH<sub>2</sub>CH<sub>2</sub>CH<sub>2</sub>Ph), 7.5 (SiCH<sub>2</sub>CH<sub>3</sub>), 3.3 (SiCH<sub>2</sub>CH<sub>3</sub>). Anal. Calcd for C<sub>27</sub>H<sub>44</sub>Cl<sub>2</sub>O<sub>3</sub>SiTi: C, 57.55; H, 7.87. Found: C, 57.39; H, 8.06.

### Synthesis of 1G-[(CH<sub>2</sub>)<sub>3</sub>{[C<sub>6</sub>H<sub>3</sub>(OMe)]O}Ti(C<sub>5</sub>Me<sub>5</sub>)Cl<sub>2</sub>]<sub>4</sub> (**5**)

A solution of 1G-[(CH<sub>2</sub>)<sub>3</sub>[C<sub>6</sub>H<sub>3</sub>(OMe)]OH]<sub>4</sub> (0.40 g, 0.37 mmol) in CH<sub>2</sub>Cl<sub>2</sub> (10 mL) was slowly added to a solution of [Ti(C<sub>5</sub>Me<sub>5</sub>)Cl<sub>2</sub>Me] (0.40 g, 1.48 mmol) in CH<sub>2</sub>Cl<sub>2</sub> (5 mL). The mixture was allowed to stir overnight. The solvent was removed at reduced pressure, to obtain an oily red solid. The product was washed with a mixture of Et<sub>2</sub>O/hexane (1:4) to give **5** as a red foamy solid (0.57g, 74 %). <sup>1</sup>H-NMR(CDCl<sub>3</sub>): δ 6.89 (m, 1H, C<sub>6</sub>H<sub>3</sub>), 6.61 (m, 2H, C<sub>6</sub>H<sub>3</sub>), 3.79 (s, 3H, OMe), 2.54 (m, 2H, SiCH<sub>2</sub>CH<sub>2</sub>CH<sub>2</sub>Ph), 2.17 (s, 15H, C<sub>5</sub>Me<sub>5</sub>), 1.54 (m, 2H, SiCH<sub>2</sub>CH<sub>2</sub>CH<sub>2</sub>Ph), 1.29 (m, 2H, SiCH<sub>2</sub>CH<sub>2</sub>CH<sub>2</sub>Si), 0.53 (m br, 6H, SiCH<sub>2</sub>CH<sub>2</sub>CH<sub>2</sub>Si and SiCH<sub>2</sub>CH<sub>2</sub>CH<sub>2</sub>Ph overlapping), -0.06 (s, 6H, SiMe<sub>2</sub>). <sup>13</sup>C-NMR(CDCl<sub>3</sub>): δ 153.5 (C<sub>ipso</sub> bonded to -OTi), 149.9 (C<sub>ipso</sub> bonded to -OMe), 138.6 (C<sub>ipso</sub> bonded to -CH<sub>2</sub>), 132.6 (C<sub>5</sub>Me<sub>5</sub>), 120.6, 120.2 and 113.1 (C<sub>6</sub>H<sub>3</sub>), 56.3 (OMe), 39.9 (SiCH<sub>2</sub>CH<sub>2</sub>CH<sub>2</sub>Ph), 26.1 (SiCH<sub>2</sub>CH<sub>2</sub>CH<sub>2</sub>Ph), 15.3 (SiCH<sub>2</sub>CH<sub>2</sub>CH<sub>2</sub>Ph), 20.3, 18.6, 17.6 (Si(CH<sub>2</sub>)<sub>3</sub>Si), 12.8 (C<sub>5</sub>Me<sub>5</sub>), -3.3 (SiMe<sub>2</sub>). <sup>29</sup>Si{<sup>1</sup>H} NMR (CDCl<sub>3</sub>): δ 1.91 (G1-Si) and 0.86 (G0-Si). Anal. Calcd. for C<sub>100</sub>H<sub>156</sub>Cl<sub>8</sub>O<sub>8</sub>Si<sub>5</sub>Ti<sub>4</sub>: C, 57.14; H, 7.48. Found: C, 57.11; H, 7.51

### Synthesis of 2G-[(CH<sub>2</sub>)<sub>3</sub>{[C<sub>6</sub>H<sub>3</sub>(OMe)]O}Ti(C<sub>5</sub>Me<sub>5</sub>)Cl<sub>2</sub>]<sub>8</sub> (**6**)

This dendrimer was prepared by a similar method to that described for **5**, starting from 2G-[(CH<sub>2</sub>)<sub>3</sub>[C<sub>6</sub>H<sub>3</sub>(OMe)]OH]<sub>8</sub> (0.30 g, 0.12 mmol) and [Ti(C<sub>5</sub>Me<sub>5</sub>)Cl<sub>2</sub>Me] (0.26 g, 0.96 mmol), affording **6** as a red foamy solid (0.38 g, 70%). <sup>1</sup>H-NMR(CDCl<sub>3</sub>): δ 6.89 (m, 2H, C<sub>6</sub>H<sub>3</sub>), 6.62 (m, 4H, C<sub>6</sub>H<sub>3</sub>), 3.79 (s, 6H, OMe), 2.53 (m, 4H, SiCH<sub>2</sub>CH<sub>2</sub>CH<sub>2</sub>Ph), 2.17 (s, 30H, C<sub>5</sub>Me<sub>5</sub>), 1.55 (m, 4H, SiCH<sub>2</sub>CH<sub>2</sub>CH<sub>2</sub>Ph), 1.29 (m, 6H, SiCH<sub>2</sub>CH<sub>2</sub>CH<sub>2</sub>Si) 0.53

(m br, 16H,  $\text{SiCH}_2\text{CH}_2\text{CH}_2\text{Si}$  and  $\text{SiCH}_2\text{CH}_2\text{CH}_2\text{Ph}$  overlapping), -0.07 (s, 12H,  $\text{SiMe}_2$ ), -0.09 (s, 3H, SiMe).  $^{13}\text{C}$ -NMR( $\text{CDCl}_3$ );  $\delta$  153.3 ( $\text{C}_{\text{ipso}}$  bonded to -OTi), 149.7 ( $\text{C}_{\text{ipso}}$  bonded to -OMe), 138.5 ( $\text{C}_{\text{ipso}}$  bonded to  $-\text{CH}_2$ ), 132.6 ( $\text{C}_5\text{Me}_5$ ), 120.6, 120.1 and 113.0 ( $\text{C}_6\text{H}_3$ ), 56.3 (OMe), 39.9 ( $\text{SiCH}_2\text{CH}_2\text{CH}_2\text{Ph}$ ), 26.2 ( $\text{SiCH}_2\text{CH}_2\text{CH}_2\text{Ph}$ ), 15.4 ( $\text{SiCH}_2\text{CH}_2\text{CH}_2\text{Ph}$ ), 20.2, 18.9, 18.5 and overlapped signals ( $\text{Si}(\text{CH}_2)_3\text{Si}$ ), 12.8 ( $\text{C}_5\text{Me}_5$ ), -3.1 ( $\text{SiMe}_2$ ), -4.9 (SiMe).  $^{29}\text{Si}\{^1\text{H}\}$  NMR ( $\text{CDCl}_3$ ):  $\delta$  1.87 (G2-Si), 1.19 (G1-Si) and 0.80 (G0-Si). Anal. Calcd. for  $\text{C}_{216}\text{H}_{348}\text{Cl}_{16}\text{O}_{16}\text{Si}_{13}\text{Ti}_8$ : C, 57.44; H, 7.77. Found: C, 56.32; H, 8.02.

### Synthesis of 4G- $[(\text{CH}_2)_3\{\text{C}_6\text{H}_3(\text{OMe})\text{O}\}\text{Ti}(\text{C}_5\text{Me}_5)\text{Cl}_2]_{32}$ (7)

A solution of 4G- $\{(\text{CH}_2)_3[\text{C}_6\text{H}_3(\text{OMe})\text{OH}]\}_{32}$  (0.30 g,  $2.75 \times 10^{-2}$  mmol) in  $\text{CH}_2\text{Cl}_2$  (10 mL) was slowly added to a solution of  $[\text{Ti}(\text{C}_5\text{Me}_5)\text{Cl}_2\text{Me}]$  (0.24 g, 0.91 mmol) in  $\text{CH}_2\text{Cl}_2$  (5 mL). The mixture was stirred overnight. The solvent was removed at reduced pressure, to obtain a foamy red solid. The product was washed with  $\text{Et}_2\text{O}$  (2x2 mL) to give **7** as a red foamy solid (0.39 g, 75% rto).  $^1\text{H}$ -NMR( $\text{CDCl}_3$ ):  $\delta$  6.84 (m, 8H,  $\text{C}_6\text{H}_3$ ), 6.60 (m, 16H,  $\text{C}_6\text{H}_3$ ), 3.77 (s, 24H, OMe), 2.52 (m, 16H,  $\text{SiCH}_2\text{CH}_2\text{CH}_2\text{Ph}$ ), 2.16 (s, 120H,  $\text{C}_5\text{Me}_5$ ), 1.54 (m, 16H,  $\text{SiCH}_2\text{CH}_2\text{CH}_2\text{Ph}$ ), 1.24 (m, 30H,  $\text{SiCH}_2\text{CH}_2\text{CH}_2\text{Si}$ ), 0.52 (m br, 76H,  $\text{SiCH}_2\text{CH}_2\text{CH}_2\text{Si}$  and  $\text{SiCH}_2\text{CH}_2\text{CH}_2\text{Ph}$  overlapping), -0.07 (m br, 69 H,  $\text{SiMe}_2$  and SiMe overlapping).  $^{13}\text{C}$ -NMR( $\text{CDCl}_3$ );  $\delta$  153.4 ( $\text{C}_{\text{ipso}}$  bonded to -OTi), 149.9 ( $\text{C}_{\text{ipso}}$  bonded to -OMe), 138.6 ( $\text{C}_{\text{ipso}}$  bonded to  $-\text{CH}_2$ ), 132.7 ( $\text{C}_5\text{Me}_5$ ), 120.6, 120.1 and 113.0 ( $\text{C}_6\text{H}_3$ ), 56.3 (OMe), 39.9 ( $\text{SiCH}_2\text{CH}_2\text{CH}_2\text{Ph}$ ), 26.1 ( $\text{SiCH}_2\text{CH}_2\text{CH}_2\text{Ph}$ ), 15.3 ( $\text{SiCH}_2\text{CH}_2\text{CH}_2\text{Ph}$ ), 20.2, 18.9, 18.5 and overlapped signals ( $\text{Si}(\text{CH}_2)_3\text{Si}$ ), 12.8 ( $\text{C}_5\text{Me}_5$ ), -3.2 ( $\text{SiMe}_2$ ), -4.9 (SiMe).  $^{29}\text{Si}\{^1\text{H}\}$  NMR ( $\text{CDCl}_3$ ):  $\delta$  1.91 (G4-Si), 1.28 (G3-Si) and the rest not observed. Anal. Calcd. for  $\text{C}_{912}\text{H}_{1500}\text{Cl}_{64}\text{O}_{64}\text{Si}_{61}\text{Ti}_{32}$ : C, 57.64; H, 7.95. Found: C, 56.82; H, 7.70.

### Synthesis of $[\text{Ti}(\text{C}_5\text{Me}_5)\text{Me}_2\{\text{O}[\text{C}_6\text{H}_3(\text{OMe})(\text{CH}_2\text{-CH=CH}_2)]\}]$ (8)

A solution of eugenol (0.30 g, 1.83 mmol) in Et<sub>2</sub>O (10 mL) was slowly added to a solution of [Ti(C<sub>5</sub>Me<sub>5</sub>)Cl<sub>2</sub>Me] (0.42 g, 1.83 mmol) in Et<sub>2</sub>O (5 mL). The mixture was stirred for 2h at room temperature. Then, the solvent was removed at reduced pressure to obtain **8** as a yellow oil in quantitative yield (0.68 g). <sup>1</sup>H-NMR(CDCl<sub>3</sub>): δ 6.84 (m, 1H, C<sub>6</sub>H<sub>3</sub>), 6.69-6.61 (m, 2H, C<sub>6</sub>H<sub>3</sub>), 5.96 (m, 1H, CH<sub>2</sub>-CH=CH<sub>2</sub>), 5.06 (m, 2H, CH<sub>2</sub>-CH=CH<sub>2</sub>), 3.77 (s, 3H, OMe), 3.33 (m, 2H, CH<sub>2</sub>-CH=CH<sub>2</sub>), 1.91 (s, 15H, C<sub>5</sub>Me<sub>5</sub>), 0.41 (s, 6H, TiMe<sub>2</sub>). <sup>13</sup>C-NMR(CDCl<sub>3</sub>): δ 151.5 (C<sub>ipso</sub> bonded to -OTi), 150.5 (C<sub>ipso</sub> bonded to -OMe), 137.9 (CH<sub>2</sub>-CH=CH<sub>2</sub>), 132.6 (C<sub>ipso</sub> bonded to -C<sub>3</sub>H<sub>5</sub>), 122.3(C<sub>5</sub>Me<sub>5</sub>), 115.4 (CH<sub>2</sub>-CH=CH<sub>2</sub>), 120.5, 119.8, 112.6 (C<sub>6</sub>H<sub>3</sub>), 55.7 (OMe), 53.9 (TiMe<sub>2</sub>), 40.0 (CH<sub>2</sub>-CH=CH<sub>2</sub>), 11.3 (C<sub>5</sub>Me<sub>5</sub>). Anal. Calcd. for C<sub>22</sub>H<sub>32</sub>O<sub>2</sub>Ti: C, 70.21; H, 8.57. Found: C, 69.70; H, 8.40.

#### Synthesis of [Ti(C<sub>5</sub>Me<sub>5</sub>)Me<sub>2</sub>{O[C<sub>6</sub>H<sub>2</sub>(OMe)<sub>2</sub>(CH<sub>2</sub>CH=CH<sub>2</sub>)]} (9)

This product was prepared by a similar method to that described for **8**, starting from 4-allyl-2,6-dimethoxyphenol (0.34g, 1.75 mmol) and [Ti(C<sub>5</sub>Me<sub>5</sub>)Cl<sub>2</sub>Me] (0.40 g, 1.75 mmol), affording **9** as an oily yellow solid in quantitative yield. <sup>1</sup>H-NMR(CDCl<sub>3</sub>): δ 6.37 (s, 2H, C<sub>6</sub>H<sub>2</sub>), 5.96 (m, 1H, CH<sub>2</sub>-CH=CH<sub>2</sub>), 5.07 (m, 2H, CH<sub>2</sub>-CH=CH<sub>2</sub>), 3.77 (s, 6H, OMe), 3.31 (m, 2H, CH<sub>2</sub>-CH=CH<sub>2</sub>), 1.88(s, 15H, C<sub>5</sub>Me<sub>5</sub>), 0.42 (s, 6H, TiMe<sub>2</sub>). <sup>13</sup>C-NMR(CDCl<sub>3</sub>): δ 151.0 (C<sub>ipso</sub> bonded to -OMe), 142.8 (C<sub>ipso</sub> bonded to -OTi), 137.8 (C<sub>ipso</sub> bonded to -C<sub>3</sub>H<sub>5</sub>), 131.4 (CH<sub>2</sub>-CH=CH<sub>2</sub>), 122.1(C<sub>5</sub>Me<sub>5</sub>), 115.5 (CH<sub>2</sub>-CH=CH<sub>2</sub>), 106.0 (C<sub>6</sub>H<sub>2</sub>), 56.2 (OMe), 53.9 (TiMe<sub>2</sub>), 40.4 (CH<sub>2</sub>-CH=CH<sub>2</sub>), 11.2 (C<sub>5</sub>Me<sub>5</sub>). Anal. Calcd. for C<sub>23</sub>H<sub>34</sub>O<sub>3</sub>Ti: C, 67.97; H, 8.43. Found: C, 68.17; H, 8.58.

#### Synthesis of [Ti(C<sub>5</sub>Me<sub>5</sub>)Me<sub>2</sub>{O[C<sub>6</sub>H<sub>3</sub>(OMe)(CH<sub>2</sub>CH<sub>2</sub>CH<sub>2</sub>SiEt<sub>3</sub>)]} (10)

A solution of [HO{C<sub>6</sub>H<sub>3</sub>(OMe)(CH<sub>2</sub>CH<sub>2</sub>CH<sub>2</sub>SiEt<sub>3</sub>)] (0.40 g, 1.43 mmol) in Et<sub>2</sub>O (10 mL) was slowly added to a solution of [Ti(C<sub>5</sub>Me<sub>5</sub>)Me<sub>3</sub>] (0.33 g, 1.43 mmol) in Et<sub>2</sub>O (5 mL). The mixture was stirred for 2h at room temperature. Then, the solvent was removed at reduced pressure to obtain **10** as a yellow oil in quantitative yield (0.70 g).

$^1\text{H-NMR}(\text{CDCl}_3)$ :  $\delta$  6.82 (m, 1H,  $\text{C}_6\text{H}_3$ ), 6.64 (m, 2H,  $\text{C}_6\text{H}_3$ ), 3.78 (s, 3H, OMe). 2.56 (m, 2H,  $\text{SiCH}_2\text{CH}_2\text{CH}_2\text{Ph}$ ), 1.90 (s, 15H,  $\text{C}_5\text{Me}_5$ ), 1.58 (m, 2H,  $\text{SiCH}_2\text{CH}_2\text{CH}_2\text{Ph}$ ), 0.90 (t, 9H,  $\text{SiCH}_2\text{CH}_3$ ), 0.51 (m, 8H,  $\text{SiCH}_2\text{CH}_3$  and  $\text{SiCH}_2\text{CH}_2\text{CH}_2\text{Ph}$  overlapping), 0.40 (s, 6H,  $\text{TiMe}_2$ ).  $^{13}\text{C-NMR}(\text{CDCl}_3)$ :  $\delta$  152.2 ( $\text{C}_{\text{ipso}}$  bonded to -OTi), 150.3 ( $\text{C}_{\text{ipso}}$  bonded to -OMe), 135.5 ( $\text{C}_{\text{ipso}}$  bonded to  $-\text{CH}_2$ ), 122.2 ( $\text{C}_5\text{Me}_5$ ), 120.4, 119.7, 112.6 ( $\text{C}_6\text{H}_3$ ), 55.7 (OMe), 53.7 ( $\text{TiMe}_2$ ), 40.4 ( $\text{SiCH}_2\text{CH}_2\text{CH}_2\text{Ph}$ ), 26.1 ( $\text{SiCH}_2\text{CH}_2\text{CH}_2\text{Ph}$ ), 11.3 ( $\text{C}_5\text{Me}_5$ ), 11.1 ( $\text{SiCH}_2\text{CH}_2\text{CH}_2\text{Ph}$ ), 7.5 ( $\text{SiCH}_2\text{CH}_3$ ), 3.3 ( $\text{SiCH}_2\text{CH}_3$ ). Anal. Calcd for  $\text{C}_{28}\text{H}_{48}\text{O}_2\text{SiTi}$ : C, 68.26; H, 9.82. Found: C, 67.91; H, 9.70.

#### Synthesis of $[\text{Ti}(\text{C}_5\text{Me}_5)\text{Me}_2\{\text{O}[\text{C}_6\text{H}_2(\text{OMe})_2(\text{CH}_2\text{CH}_2\text{CH}_2\text{SiEt}_3)]\}]$ (**11**)

This product was prepared by a similar method to that described for **10**, starting from  $[\text{HO}\{\text{C}_6\text{H}_2(\text{OMe})_2(\text{CH}_2\text{CH}_2\text{CH}_2\text{SiEt}_3)\}]$  (0.40 g, 1.29 mmol) and  $[\text{Ti}(\text{C}_5\text{Me}_5)\text{Me}_3]$  (0.29 g, 1.29 mmol), affording **11** as a yellow oil in quantitative yield (0.67 g).  $^1\text{H-NMR}(\text{CDCl}_3)$ :  $\delta$  6.36 (s, 2H,  $\text{C}_6\text{H}_2$ ), 3.77 (s, 6H, OMe). 2.54 (m, 2H,  $\text{SiCH}_2\text{CH}_2\text{CH}_2\text{Ph}$ ), 1.88 (s, 15H,  $\text{C}_5\text{Me}_5$ ), 1.56 (m, 2H,  $\text{SiCH}_2\text{CH}_2\text{CH}_2\text{Ph}$ ), 0.90 (t, 9H,  $\text{SiCH}_2\text{CH}_3$ ), 0.48 (m, 8H,  $\text{SiCH}_2\text{CH}_3$  and  $\text{SiCH}_2\text{CH}_2\text{CH}_2\text{Ph}$  overlapping), 0.42 (s, 6H,  $\text{TiMe}_2$ ).  $^{13}\text{C-NMR}(\text{CDCl}_3)$ :  $\delta$  150.9 ( $\text{C}_{\text{ipso}}$  bonded to -OMe), 142.6 ( $\text{C}_{\text{ipso}}$  bonded to -OTi), 134.3 ( $\text{C}_{\text{ipso}}$  bonded to  $-\text{CH}_2$ ), 122.0 ( $\text{C}_5\text{Me}_5$ ), 106.0 ( $\text{C}_6\text{H}_2$ ), 56.3 (OMe), 53.6 ( $\text{TiMe}_2$ ), 40.4 ( $\text{SiCH}_2\text{CH}_2\text{CH}_2\text{Ph}$ ), 26.0 ( $\text{SiCH}_2\text{CH}_2\text{CH}_2\text{Ph}$ ), 11.2 ( $\text{C}_5\text{Me}_5$ ), 11.1 ( $\text{SiCH}_2\text{CH}_2\text{CH}_2\text{Ph}$ ), 7.5 ( $\text{SiCH}_2\text{CH}_3$ ), 3.3 ( $\text{SiCH}_2\text{CH}_3$ ). Anal. Calcd for  $\text{C}_{29}\text{H}_{50}\text{O}_3\text{SiTi}$ : C, 66.64; H, 9.64. Found: C, 66.30; H, 9.48.

#### Synthesis of $1\text{G}-(\text{CH}_2)_3\{[\text{C}_6\text{H}_3(\text{OMe})\text{O}]\text{Ti}(\text{C}_5\text{Me}_5)\text{Me}_2\}_4$ (**12**)

A solution of  $1\text{G}-(\text{CH}_2)_3[\text{C}_6\text{H}_3(\text{OMe})\text{OH}]_4$  (0.47 g, 0.43 mmol) in  $\text{Et}_2\text{O}$  (10 mL) was slowly added to a solution of  $[\text{Ti}(\text{C}_5\text{Me}_5)\text{Me}_3]$  (0.40 g, 1.74 mmol) in  $\text{Et}_2\text{O}$  (5 mL). The reaction mixture was stirred for 2h at room temperature. Then, the solvent was removed at reduced pressure to obtain **12** as a brown-yellow oil in quantitative yield (0.84 g).  $^1\text{H-}$

NMR(CDCl<sub>3</sub>):  $\delta$  6.83 (m, 1H, C<sub>6</sub>H<sub>3</sub>), 6.63 (m, 2H, C<sub>6</sub>H<sub>3</sub>), 3.77 (s, 3H, OMe), 2.55 (m, 2H, SiCH<sub>2</sub>CH<sub>2</sub>CH<sub>2</sub>Ph), 1.91 (s, 15H, C<sub>5</sub>Me<sub>5</sub>), 1.58 (m, 2H, SiCH<sub>2</sub>CH<sub>2</sub>CH<sub>2</sub>Ph), 1.32 (m, 2H, SiCH<sub>2</sub>CH<sub>2</sub>CH<sub>2</sub>Si), 0.55 (m br, 6H, SiCH<sub>2</sub>CH<sub>2</sub>CH<sub>2</sub>Si and SiCH<sub>2</sub>CH<sub>2</sub>CH<sub>2</sub>Ph overlapping), 0.40 (s, 6H, TiMe<sub>2</sub>) -0.04 (s, 6H, SiMe<sub>2</sub>). <sup>13</sup>C-NMR(CDCl<sub>3</sub>):  $\delta$  152.2(C<sub>ipso</sub> bonded to -OTi), 150.2 (C<sub>ipso</sub> bonded to -OMe), 135.5 (C<sub>ipso</sub> bonded to CH<sub>2</sub>), 122.1 (C<sub>5</sub>Me<sub>5</sub>) 120.3, 119.7, and 112.5 (C<sub>6</sub>H<sub>3</sub>), 55.7 (OMe), 53.8 (TiMe<sub>2</sub>), 39.9 (SiCH<sub>2</sub>CH<sub>2</sub>CH<sub>2</sub>Ph), 26.4 (SiCH<sub>2</sub>CH<sub>2</sub>CH<sub>2</sub>Ph), 15.5 (SiCH<sub>2</sub>CH<sub>2</sub>CH<sub>2</sub>Ph), 20.4, 18.7, 17.7 (Si(CH<sub>2</sub>)<sub>3</sub>Si), 11.4 (C<sub>5</sub>Me<sub>5</sub>), -3.1 (SiMe<sub>2</sub>). <sup>29</sup>Si{<sup>1</sup>H} NMR (CDCl<sub>3</sub>):  $\delta$  1.89 (G1-Si) and 0.86 (G0-Si). Anal. Calcd. for C<sub>108</sub>H<sub>180</sub>O<sub>8</sub>Si<sub>5</sub>Ti<sub>4</sub>: C, 66.92; H, 9.36. Found: C, 66.90; H, 9.20.

#### Synthesis of 2G-[(CH<sub>2</sub>)<sub>3</sub>{[C<sub>6</sub>H<sub>3</sub>(OMe)]O}Ti(C<sub>5</sub>Me<sub>5</sub>)Me<sub>2</sub>]<sub>8</sub> (13)

This dendrimer was obtained by a similar procedure to that described for **12**, starting from 2G-[(CH<sub>2</sub>)<sub>3</sub>[C<sub>6</sub>H<sub>3</sub>(OMe)]OH]<sub>8</sub> (0.54 g, 0.22 mmol) and [Ti(C<sub>5</sub>Me<sub>5</sub>)Me<sub>3</sub>] (0.40 g, 1.74 mmol), to obtain **13** as a brown-yellow oil in quantitative yield (0.92 g). <sup>1</sup>H-NMR(CDCl<sub>3</sub>):  $\delta$  6.84 (m, 2H, C<sub>6</sub>H<sub>3</sub>), 6.62 (m, 4H, C<sub>6</sub>H<sub>3</sub>), 3.76 (s, 6H, OMe), 2.54 (m, 4H, SiCH<sub>2</sub>CH<sub>2</sub>CH<sub>2</sub>Ph), 1.90 (s, 30H, C<sub>5</sub>Me<sub>5</sub>), 1.57 (m, 4H, SiCH<sub>2</sub>CH<sub>2</sub>CH<sub>2</sub>Ph), 1.30 (m, 6H, SiCH<sub>2</sub>CH<sub>2</sub>CH<sub>2</sub>Si) 0.54 (m br, 16H, SiCH<sub>2</sub>CH<sub>2</sub>CH<sub>2</sub>Si and SiCH<sub>2</sub>CH<sub>2</sub>CH<sub>2</sub>Ph overlapping), 0.40 (s, 12H, TiMe<sub>2</sub>), -0.05 (s, 12H, SiMe<sub>2</sub>), -0.07 (s, 3H, SiMe). <sup>13</sup>C-NMR(CDCl<sub>3</sub>):  $\delta$  152.2 (C<sub>ipso</sub> bonded to -OTi), 150.3 (C<sub>ipso</sub> bonded to -OMe), 135.5 (C<sub>ipso</sub> bonded to -CH<sub>2</sub>), 122.2 (C<sub>5</sub>Me<sub>5</sub>), 120.3, 119.7 and 112.5 (C<sub>6</sub>H<sub>3</sub>), 55.7 (OMe), 53.7(TiMe<sub>2</sub>) 39.9 (SiCH<sub>2</sub>CH<sub>2</sub>CH<sub>2</sub>Ph), 26.3 (SiCH<sub>2</sub>CH<sub>2</sub>CH<sub>2</sub>Ph), 15.4 (SiCH<sub>2</sub>CH<sub>2</sub>CH<sub>2</sub>Ph), 20.2, 18.8, 18.5 and overlapped signals (Si(CH<sub>2</sub>)<sub>3</sub>Si), 11.4 (C<sub>5</sub>Me<sub>5</sub>), -3.2 (SiMe<sub>2</sub>), -4.9 (SiMe). <sup>29</sup>Si{<sup>1</sup>H} NMR (CDCl<sub>3</sub>):  $\delta$  1.90 (G2-Si), 1.18 (G1-Si) and 0.79 (G0-Si). Anal. Calcd. for C<sub>232</sub>H<sub>396</sub>O<sub>16</sub>Si<sub>13</sub>Ti<sub>8</sub>: C, 66.51; H, 9.53. Found: C, 65.10; H, 9.38.

#### Synthesis of 4G-[(CH<sub>2</sub>)<sub>3</sub>{[C<sub>6</sub>H<sub>3</sub>(OMe)]O}Ti(C<sub>5</sub>Me<sub>5</sub>)Me<sub>2</sub>]<sub>32</sub> (14)



This dendrimer was prepared following a similar procedure to that described in the preparation of **12**, starting from 4G- $\{(\text{CH}_2)_3[\text{C}_6\text{H}_3(\text{OMe})]\text{OH}\}_{32}$  (0.30 g,  $2.75 \times 10^{-2}$  mmol) and  $[\text{Ti}(\text{C}_5\text{Me}_5)\text{Me}_3]$  (0.20 g, 0.88 mmol), affording **14** as a brown-yellow oil in quantitative yield (0.48g).  $^1\text{H-NMR}(\text{CDCl}_3)$ :  $\delta$  6.80 (m, 8H,  $\text{C}_6\text{H}_3$ ), 6.60 (m, 16H,  $\text{C}_6\text{H}_3$ ), 3.73 (s, 24H, OMe), 2.53 (m, 16H,  $\text{SiCH}_2\text{CH}_2\text{CH}_2\text{Ph}$ ), 1.88 (s, 120H,  $\text{C}_5\text{Me}_5$ ), 1.56 (m, 16H,  $\text{SiCH}_2\text{CH}_2\text{CH}_2\text{Ph}$ ), 1.30 (m, 30H,  $\text{SiCH}_2\text{CH}_2\text{CH}_2\text{Si}$ ), 0.54 (m br, 76H,  $\text{SiCH}_2\text{CH}_2\text{CH}_2\text{Si}$  and  $\text{SiCH}_2\text{CH}_2\text{CH}_2\text{Ph}$  overlapping), 0.38 (s, 48H,  $\text{TiMe}_2$ ), -0.06 (m br, 69 H,  $\text{SiMe}_2$  and  $\text{SiMe}$  overlapping).  $^{13}\text{C-NMR}(\text{CDCl}_3)$ ;  $\delta$  152.3 ( $\text{C}_{\text{ipso}}$  bonded to -OTi), 150.3 ( $\text{C}_{\text{ipso}}$  bonded to -OMe), 135.5 ( $\text{C}_{\text{ipso}}$  bonded to - $\text{CH}_2$ ), 122.2 ( $\text{C}_5\text{Me}_5$ ), 120.3, 119.7 and 112.5 ( $\text{C}_6\text{H}_3$ ), 55.7 (OMe), 53.8 ( $\text{TiMe}_2$ ), 39.9 ( $\text{SiCH}_2\text{CH}_2\text{CH}_2\text{Ph}$ ), 26.3 ( $\text{SiCH}_2\text{CH}_2\text{CH}_2\text{Ph}$ ), 15.4 ( $\text{SiCH}_2\text{CH}_2\text{CH}_2\text{Ph}$ ), 20.2, 18.8, 18.5 and overlapped signals ( $\text{Si}(\text{CH}_2)_3\text{Si}$ ), 11.4 ( $\text{C}_5\text{Me}_5$ ), -3.2 ( $\text{SiMe}_2$ ), -4.9 ( $\text{SiMe}$ ).  $^{29}\text{Si}\{^1\text{H}\}$  NMR ( $\text{CDCl}_3$ ):  $\delta$  1.94 (G4-Si), 1.31 (G3-Si) and the rest not observed. Anal. Calcd. for  $\text{C}_{976}\text{H}_{1692}\text{O}_{64}\text{Si}_{61}\text{Ti}_{32}$ : C, 66.24; H, 9.64. Found: C, 65.02; H, 9.40.

#### Synthesis of $[\text{Ti}(\text{C}_5\text{H}_5)_2\text{Cl}\{\text{O}[\text{C}_6\text{H}_3(\text{OMe})(\text{CH}_2\text{CH}=\text{CH}_2)]\}]$ (**15**)

A solution of eugenol (0.33 g, 2.0 mmol), in toluene (10 mL) was slowly added to a solution of  $[\text{Ti}(\text{C}_5\text{H}_5)_2\text{Cl}_2]$  (0.50 g, 2.0 mmol) in toluene (50 mL), to this mixture a slight excess of  $\text{NEt}_3$  (0.30 mL, 2.9 mmol) was added. The reaction mixture was stirred for 12h and then filtered through celite to remove  $\text{NEt}_3\cdot\text{HCl}$ . The resulting red solution was evaporate under reduced pressure to obtain a red oil that was washed with hexane (2x5 mL) to give **15** as red microcrystalline solid (0.45 g, 60 %).  $^1\text{H-NMR}(\text{CDCl}_3)$ :  $\delta$  6.69 – 6.62 (m, 3H,  $\text{C}_6\text{H}_3$ ), 6.33 (s, 10H  $\text{C}_5\text{H}_5$ ), 5.93 (m, 1H,  $\text{CH}_2\text{-CH}=\text{CH}_2$ ), 5.01 (m, 2H,  $\text{CH}_2\text{-CH}=\text{CH}_2$ ), 3.77 (s, 3H, OMe), 3.30 (d, 2H,  $\text{CH}_2\text{-CH}=\text{CH}_2$ ).  $^{13}\text{C-NMR}$  ( $\text{CDCl}_3$ ):  $\delta$  159.5 ( $\text{C}_{\text{ipso}}$  bonded to -OTi), 146.3 ( $\text{C}_{\text{ipso}}$  bonded to -OMe), 138.0 ( $\text{CH}_2\text{-CH}=\text{CH}_2$ ), 132.1 ( $\text{C}_{\text{ipso}}$  bonded to - $\text{C}_3\text{H}_5$ ), 120.9, 117.4, and 111.9 ( $\text{C}_6\text{H}_3$ ), 117.6 ( $\text{C}_5\text{H}_5$ ),

115.3 ( $\text{CH}_2\text{-CH=CH}_2$ ), 55.8 (OMe), 39.9 ( $\text{CH}_2\text{-CH=CH}_2$ ). Anal. Calcd for  $\text{C}_{20}\text{H}_{21}\text{ClO}_2\text{Ti}$ : C, 63.77; H, 5.62. Found: C, 64.02; H, 6.12.

### Synthesis of $[\text{Ti}(\text{C}_5\text{H}_5)_2\text{Cl}\{\text{O}[\text{C}_6\text{H}_3(\text{OMe})(\text{CH}_2\text{CH}_2\text{CH}_2\text{SiEt}_3)]\}]$ (**16**)

A solution of  $[\text{OH}\{\text{C}_6\text{H}_3(\text{OMe})(\text{CH}_2\text{CH}_2\text{CH}_2\text{SiEt}_3)\}]$  (0.12 g, 0.44 mmol) in toluene (10 mL) was slowly added to a solution of  $[\text{Ti}(\text{C}_5\text{H}_5)_2\text{Cl}_2]$  (0.11 g, 0.44 mmol) in toluene (50 mL). To this mixture a slight excess of  $\text{NEt}_3$  (90  $\mu\text{L}$ , 0.64 mmol) was added. The reaction mixture was stirred for 12h and then filtered through celite to remove  $\text{NEt}_3\cdot\text{HCl}$ . The resulting red solution was evaporated under reduced pressure, affording **16** as an oily red compound (0.12 g, 55%).  $^1\text{H}$ - NMR ( $\text{CDCl}_3$ ):  $\delta$  6.67 – 6.60 (m, 3H,  $\text{C}_6\text{H}_3$ ), 6.34 (s, 10H,  $\text{C}_5\text{H}_5$ ), 3.78 (s, 3H, OMe), 2.53 (m, 2H,  $\text{SiCH}_2\text{CH}_2\text{CH}_2\text{Ph}$ ), 1.56 (m, 2H,  $\text{SiCH}_2\text{CH}_2\text{CH}_2\text{Ph}$ ), 0.89 (t, 9H,  $\text{SiCH}_2\text{CH}_3$ ), 0.49 (m, 8H,  $\text{SiCH}_2\text{CH}_2\text{CH}_2\text{Ph}$  and  $\text{SiCH}_2\text{CH}_3$  overlapping).  $^{13}\text{C}$ - NMR ( $\text{CDCl}_3$ ):  $\delta$  159.4 ( $\text{C}_{\text{ipso}}$  bonded to  $-\text{OTi}$ ), 146.1 ( $\text{C}_{\text{ipso}}$  bonded to  $-\text{OMe}$ ), 135 ( $\text{C}_{\text{ipso}}$  bonded to  $-\text{CH}_2$ ), 120.8, 120.1 and 111.9 ( $\text{C}_6\text{H}_3$ ),  $\delta$  117.5 ( $\text{C}_5\text{H}_5$ ), 55.8 ( $\text{OCH}_3$ ), 39.9 ( $\text{SiCH}_2\text{CH}_2\text{CH}_2\text{Ph}$ ), 26.2. ( $\text{SiCH}_2\text{CH}_2\text{CH}_2\text{Ph}$ ), 11.1( $\text{SiCH}_2\text{CH}_2\text{CH}_2\text{Ph}$ ), 7.5 ( $\text{SiCH}_2\text{CH}_3$ ), 3.3( $\text{SiCH}_2\text{CH}_3$ ). Anal. Calcd. for  $\text{C}_{26}\text{H}_{37}\text{ClO}_2\text{SiTi}$ : C, 63.38; H, 7.52. Found: C, 63.08; H, 7.37.

### Synthesis of $1\text{G}-[(\text{CH}_2)_3\{\text{C}_6\text{H}_3(\text{OMe})\text{O}\}\text{Ti}(\text{C}_5\text{H}_5)_2\text{Cl}]_4$ (**17**)

A solution of  $1\text{G}-\{(\text{CH}_2)_3[\text{C}_6\text{H}_3(\text{OMe})]\text{OH}\}_4$  (0.14 g, 0.12 mmol) in toluene (10 mL) was slowly added to a solution of  $[\text{Ti}(\text{C}_5\text{H}_5)_2\text{Cl}_2]$  (0.12 g, 0.50 mmol) in toluene (50 mL), over this mixture a slight excess of  $\text{NEt}_3$  (80  $\mu\text{L}$ , 0.57 mmol) was added. The reaction mixture was stirred for 12h and then filtered through celite to remove  $\text{NEt}_3\cdot\text{HCl}$ . The resulting red solution was evaporated under reduced pressure to give **17** as red microcrystalline solid (0.18 g, 68%).  $^1\text{H}$ - NMR ( $\text{CDCl}_3$ ):  $\delta$  6.67 – 6.60 (m, 3H,  $\text{C}_6\text{H}_3$ ), 6.33 (s, 10H,  $\text{C}_5\text{H}_5$ ), 3.77 (s, 3H, OMe), 2.34 (m, 2H,  $\text{SiCH}_2\text{CH}_2\text{CH}_2\text{Ph}$ ), 1.56 (m, 2H,  $\text{SiCH}_2\text{CH}_2\text{CH}_2\text{Ph}$ ), 1.29 (m, 2H,  $\text{SiCH}_2\text{CH}_2\text{CH}_2\text{-Si}$ ), 0.50 (m, 6H,  $\text{SiCH}_2\text{CH}_2\text{CH}_2\text{Ph}$

and  $\text{SiCH}_2\text{CH}_2\text{CH}_2\text{Si}$  overlapping),  $-0.06$  (s, 6H,  $\text{SiMe}_2$ ).  $^{13}\text{C}$ - NMR ( $\text{CDCl}_3$ ):  $\delta$  159.3 ( $\text{C}_{\text{ipso}}$  bonded to  $-\text{OTi}$ ), 146.1 ( $\text{C}_{\text{ipso}}$  bonded to  $-\text{OMe}$ ), 135.2 ( $\text{C}_{\text{ipso}}$  bonded to  $-\text{CH}_2$ ), 120.7, 120.1 and 111.9 ( $\text{C}_6\text{H}_3$ ), 117.2 ( $\text{C}_5\text{H}_5$ ), 55.8 ( $\text{OMe}$ ), 39.9 ( $\text{SiCH}_2\text{CH}_2\text{CH}_2\text{Ph}$ ), 26.4. ( $\text{SiCH}_2\text{CH}_2\text{CH}_2\text{Ph}$ ), 15.4 ( $\text{SiCH}_2\text{CH}_2\text{CH}_2\text{Ph}$ ), 20.3, 18.6 and 17.6 ( $\text{Si}(\text{CH}_2)_3\text{Si}$ ),  $-3.3$  ( $\text{SiMe}_2$ ).  $^{29}\text{Si}\{^1\text{H}\}$  NMR ( $\text{CDCl}_3$ ):  $\delta$  1.91 (G2-Si), 0.86 (G0-Si). Anal. Calcd for  $\text{C}_{100}\text{H}_{136}\text{Cl}_4\text{O}_8\text{Si}_5\text{Ti}_4$ : C, 61.91; H, 7.07. Found: C. 62.41; H, 7.26.

### Synthesis of 2 G-[( $\text{CH}_2$ )<sub>3</sub>{[ $\text{C}_6\text{H}_3(\text{OMe})\text{O}$ ]}Ti( $\text{C}_5\text{H}_5$ )<sub>2</sub>Cl]<sub>8</sub> (**18**)

This dendrimer was prepared by a similar method to that described for **17**, starting from 2G-[( $\text{CH}_2$ )<sub>3</sub>[ $\text{C}_6\text{H}_3(\text{OMe})\text{OH}$ ]]<sub>8</sub> (0.10 g, 0.04 mmol),  $[\text{Ti}(\text{C}_5\text{H}_5)_2\text{Cl}_2]$  (0.08 g, 0.30 mmol), and  $\text{NEt}_3$  (50  $\mu\text{L}$ , 0.36 mmol), affording **18** as red microcrystalline solid (0.127 g, 79%).  $^1\text{H}$ - NMR ( $\text{CDCl}_3$ ):  $\delta$  6.67 – 6.60 (m, 6H,  $\text{C}_6\text{H}_3$ ), 6.32 (s, 20H,  $\text{C}_5\text{H}_5$ ), 3.76 (s, 6H,  $\text{OMe}$ ), 2.51 (m, 4H,  $\text{SiCH}_2\text{CH}_2\text{CH}_2\text{Ph}$ ), 1.54 (m, 4H,  $\text{SiCH}_2\text{CH}_2\text{CH}_2\text{Ph}$ ), 1.29 (m, 6H,  $\text{SiCH}_2\text{CH}_2\text{CH}_2\text{Si}$ ), 0.50 (m, 16H,  $\text{SiCH}_2\text{CH}_2\text{CH}_2\text{Ph}$  and  $\text{SiCH}_2\text{CH}_2\text{CH}_2\text{Si}$  overlapping),  $-0.07$  (s, 12H,  $\text{SiMe}_2$ ),  $-0.09$  (s, 3H,  $\text{SiMe}$ ).  $^{13}\text{C}$ - NMR ( $\text{CDCl}_3$ ):  $\delta$  159.1 ( $\text{C}_{\text{ipso}}$  bonded to  $-\text{OTi}$ ), 145.8 ( $\text{C}_{\text{ipso}}$  bonded to  $-\text{OMe}$ ), 134.9 ( $\text{C}_{\text{ipso}}$  bonded to  $-\text{C}_6\text{H}_3$ ), 125.1, 120.5 and 111.8 ( $\text{C}_6\text{H}_3$ ), 117.4 ( $\text{C}_5\text{H}_5$ ), 55.9 ( $\text{OCH}_3$ ), 39.9 ( $\text{SiCH}_2\text{CH}_2\text{CH}_2\text{Ph}$ ), 26.4. ( $\text{SiCH}_2\text{CH}_2\text{CH}_2\text{Ph}$ ), 15.6 ( $\text{SiCH}_2\text{CH}_2\text{CH}_2\text{Ph}$ ), 22.7, 19.1, 18.7 and overlapped signals ( $\text{Si}(\text{CH}_2)_3\text{Si}$ ),  $-2.9$  ( $\text{SiMe}_2$ ),  $-4.6$  ( $\text{SiMe}$ ).  $^{29}\text{Si}\{^1\text{H}\}$  NMR ( $\text{CDCl}_3$ ):  $\delta$  1.87 (G2-Si), 1.19 (G1-Si) and 0.77 (G0-Si). Anal. Calcd for  $\text{C}_{216}\text{H}_{308}\text{Cl}_8\text{O}_{16}\text{Si}_{13}\text{Ti}_8$ : C, 61.88; H, 7.40. Found: C, 61.52; H, 7.46.

### Synthesis of $[\text{Zr}(\text{C}_5\text{H}_5)_2\{\text{O}[\text{C}_6\text{H}_3(\text{OMe})(\text{CH}_2\text{CH}=\text{CH}_2)]_2\}]$ (**19**)

A solution of  $[\text{Zr}(\text{C}_5\text{H}_5)_2\text{Cl}_2]$  (0.99 g, 3.4 mmol) in THF (10 mL) was added to a solution of eugenol (1.1 g, 6.7 mmol) in THF (10 mL). To this mixture a slight excess of  $\text{NEt}_3$  (1.05 mL, 7.5 mmol) was added. The reaction mixture was stirred for 12h and then filtered through celite to remove  $\text{NEt}_3\cdot\text{HCl}$ . The resulting yellow solution was

evaporate under reduced pressure to obtain a yellow oil that was extracted with hexane. The resulting hexane solution was evaporated under reduced pressure affording **19** as a yellow solid (0.78 g, 42%).  $^1\text{H-NMR}$  ( $\text{CDCl}_3$ ):  $\delta$  6.67 - 6.63 (m, 6H,  $\text{C}_6\text{H}_3$ ), 6.28 (s, 10H,  $\text{C}_5\text{H}_5$ ), 5.97 (m, 2H,  $\text{CH}_2\text{-CH=CH}_2$ ), 5.06 (m, 4H,  $\text{CH}_2\text{-CH=CH}_2$ ), 3.84 (s, 6H, OMe), 3.32 (d, 4H,  $\text{CH}_2\text{-CH=CH}_2$ ).  $^{13}\text{C-NMR}$  ( $\text{CDCl}_3$ ):  $\delta$  153.6 ( $\text{C}_{\text{ipso}}$  bonded to  $-\text{OZr}$ ), 149.1 ( $\text{C}_{\text{ipso}}$  bonded to  $-\text{OMe}$ ), 138.2 ( $\text{CH}_2\text{-CH=CH}_2$ ), 130.4 ( $\text{C}_{\text{ipso}}$  bonded to  $-\text{C}_3\text{H}_5$ ), 120.8, 118.4, and 112.4 ( $\text{C}_6\text{H}_3$ ), 113.3 ( $\text{C}_5\text{H}_5$ ), 115.2 ( $\text{CH}_2\text{-CH=CH}_2$ ), 55.7 ( $\text{OCH}_3$ ), 39.9 ( $\text{CH}_2\text{-CH=CH}_2$ ). Anal. Calcd. for  $\text{C}_{30}\text{H}_{32}\text{O}_4\text{Zr}$ : C, 65.79; H, 5.85. Found: C, 65.22; H, 5.53.

#### Synthesis of $[\text{Zr}(\text{C}_5\text{H}_5)_2\text{Cl}\{\text{O}[\text{C}_6\text{H}_3(\text{OMe})(\text{CH}_2\text{CH=CH}_2)]\}]$ (**20**)

A solution of eugenol,  $\{\text{OH}[\text{C}_6\text{H}_3(\text{OMe})(\text{CH}_2\text{CH=CH}_2)]\}$ , (0.14 g, 0.50 mmol) in THF (10 mL) was slowly added to a suspension of  $[\text{Zr}(\text{C}_5\text{H}_5)_2\text{HCl}]$  (0.13 g, 0.50 mmol) in THF (10 mL). After hydrogen evolution ceased, the resulting yellow solution was evaporated under reduced pressure, affording **20** as a yellow oil.  $^1\text{H-NMR}(\text{CDCl}_3)$ :  $\delta$  6.62 – 6.56 (m, 3H,  $\text{C}_6\text{H}_3$ ), 6.34 (s, 10H,  $\text{C}_5\text{H}_5$ ), 5.93 (m, 1H,  $\text{CH}_2\text{-CH=CH}_2$ ), 5.02 (m, 2H,  $\text{CH}_2\text{-CH=CH}_2$ ), 3.83 (s, 3H, OMe), 3.29 (d, 2H,  $\text{CH}_2\text{-CH=CH}_2$ ).  $^{13}\text{C-NMR}(\text{CDCl}_3)$ :  $\delta$  153.3 ( $\text{C}_{\text{ipso}}$  bonded to  $-\text{OZr}$ ), 148.5 ( $\text{C}_{\text{ipso}}$  bonded to  $-\text{OMe}$ ), 138.2 ( $\text{CH}_2\text{-CH=CH}_2$ ), 121.4, 118.1, and 112.3 ( $\text{C}_6\text{H}_3$ ), 114.3 ( $\text{C}_5\text{H}_5$ ), 116.2 ( $\text{CH}_2\text{-CH=CH}_2$ ), 55.8 ( $\text{OCH}_3$ ), 40.2 ( $\text{CH}_2\text{-CH=CH}_2$ ). Anal. Calcd. for  $\text{C}_{20}\text{H}_{21}\text{ClO}_2\text{Zr}$ : C, 57.19; H, 5.00. Found: C, 56.99; H, 4.88.

#### Synthesis of $[\text{Zr}(\text{C}_5\text{H}_5)_2\text{Cl}\{\text{O}[\text{C}_6\text{H}_3(\text{OMe})(\text{CH}_2\text{CH}_2\text{CH}_2\text{SiEt}_3)]\}]$ (**21**)

A solution of  $\{\text{OH}[\text{C}_6\text{H}_3(\text{OMe})(\text{CH}_2\text{CH}_2\text{CH}_2\text{SiEt}_3)]\}$  (0.14 g, 0.50 mmol) in THF (10 mL) was slowly added to a suspension of  $[\text{Zr}(\text{C}_5\text{H}_5)_2\text{HCl}]$  (0.13g, 0.50 mmol) in THF (10 mL). After hydrogen evolution ceased, the resulting yellow solution was evaporated under reduced pressure, affording **21** as a yellow oil.  $^1\text{H-NMR}(\text{CDCl}_3)$ :  $\delta$  6.66 – 6.59

(m, 3H, C<sub>6</sub>H<sub>3</sub>), 6.34 (s, 10H, C<sub>5</sub>H<sub>5</sub>), 3.83 (s, 3H, OMe), 2.53 (m, 2H, SiCH<sub>2</sub>CH<sub>2</sub>CH<sub>2</sub>Ph), 1.56 (m, 2H, SiCH<sub>2</sub>CH<sub>2</sub>CH<sub>2</sub>Ph), 0.89 (t, 9H, SiCH<sub>2</sub>CH<sub>3</sub>), 0.49 (m, 8H, SiCH<sub>2</sub>CH<sub>2</sub>CH<sub>2</sub>Ph and SiCH<sub>2</sub>CH<sub>3</sub> overlapping). <sup>13</sup>C-NMR (CDCl<sub>3</sub>): δ 153.4 (C<sub>ipso</sub> bonded to –OZr), 149.1 (C<sub>ipso</sub> bonded to –OCH<sub>3</sub>), 130.8 (C<sub>ipso</sub> bonded to –CH<sub>2</sub>), 120.8, 119.1 and 111.9 (C<sub>6</sub>H<sub>3</sub>), 114.5 (C<sub>5</sub>H<sub>5</sub>), 55.8 (OMe), 39.9 (SiCH<sub>2</sub>CH<sub>2</sub>CH<sub>2</sub>Ph), 26.2. (SiCH<sub>2</sub>CH<sub>2</sub>CH<sub>2</sub>Ph), 11.1 (SiCH<sub>2</sub>CH<sub>2</sub>CH<sub>2</sub>Ph), 7.5 (SiCH<sub>2</sub>CH<sub>3</sub>), 3.3(SiCH<sub>2</sub>CH<sub>3</sub>). Anal. Calcd. for C<sub>26</sub>H<sub>37</sub>ClO<sub>2</sub>SiZr: C, 58.25; H, 6.91. Found: C, 58.02; H, 6.93.

### Synthesis of 1G-[(CH<sub>2</sub>)<sub>3</sub>{[C<sub>6</sub>H<sub>3</sub>(OMe)]O}Zr(C<sub>5</sub>H<sub>5</sub>)<sub>2</sub>Cl]<sub>4</sub> (**22**)

A solution of 1G-[(CH<sub>2</sub>)<sub>3</sub>[C<sub>6</sub>H<sub>3</sub>(OMe)]OH]<sub>4</sub> (0.081 g, 0.07 mmol) in THF (5 mL) was slowly added to a suspension containing [Zr(C<sub>5</sub>H<sub>5</sub>)<sub>2</sub>HCl] (0.077 g, 0.29 mmol) in THF (5 mL). The reaction mixture was stirred for 15 min. After hydrogen evolution ceased, the resulting yellow solution was evaporated under reduced pressure, affording quantitatively **22** as a yellow oil (0.148 g). <sup>1</sup>H-NMR(CDCl<sub>3</sub>): δ 6.62 - 6.55 (m, 3H, C<sub>6</sub>H<sub>3</sub>), 6.34 (s, 10H, C<sub>5</sub>H<sub>5</sub>), 3.82 (s, 3H, OMe), 2.52 (m, 2H, SiCH<sub>2</sub>CH<sub>2</sub>CH<sub>2</sub>Ph), 1.55 (m, 2H, SiCH<sub>2</sub>CH<sub>2</sub>CH<sub>2</sub>Ph), 1.29 (m, 2H, SiCH<sub>2</sub>CH<sub>2</sub>CH<sub>2</sub>Si), 0.51 (m, 6H, SiCH<sub>2</sub>CH<sub>2</sub>CH<sub>2</sub>Ph and SiCH<sub>2</sub>CH<sub>2</sub>CH<sub>2</sub>Si overlapping), -0.05 (s, 6H, SiMe<sub>2</sub>). <sup>13</sup>C-NMR(CDCl<sub>3</sub>): δ 152.6 (C<sub>ipso</sub> bonded to –OZr), 147.9 (C<sub>ipso</sub> bonded to –OMe), 134.6 (C<sub>ipso</sub> bonded to –CH<sub>2</sub>), 120.5, 117.6 and 115.9 (C<sub>6</sub>H<sub>3</sub>), 114.4 (C<sub>5</sub>H<sub>5</sub>), 55.6 (OMe), 39.8 (SiCH<sub>2</sub>CH<sub>2</sub>CH<sub>2</sub>Ph), 26.4. (SiCH<sub>2</sub>CH<sub>2</sub>CH<sub>2</sub>Ph), 15.4 (SiCH<sub>2</sub>CH<sub>2</sub>CH<sub>2</sub>Ph), 20.3, 18.6 and 17.6 (Si(CH<sub>2</sub>)<sub>3</sub>Si), -3.2 (SiMe<sub>2</sub>). <sup>29</sup>Si{<sup>1</sup>H} NMR (CDCl<sub>3</sub>): δ 1.85 (G1-Si) and 0.82 (G0-Si). Anal. Calcd for C<sub>100</sub>H<sub>136</sub>Cl<sub>4</sub>O<sub>8</sub>Si<sub>5</sub>Zr<sub>4</sub>: C, 56.86; H, 6.44. Found: C, 56.41; H, 6.26.

### Synthesis of 2G-[(CH<sub>2</sub>)<sub>3</sub>{[C<sub>6</sub>H<sub>3</sub>(OMe)]O}Zr(C<sub>5</sub>H<sub>5</sub>)<sub>2</sub>Cl]<sub>8</sub> (**23**)

This dendrimer was prepared by a similar method to that described for **22**, starting from 2G-[(CH<sub>2</sub>)<sub>3</sub>[C<sub>6</sub>H<sub>3</sub>(OMe)]OH]<sub>8</sub> (0.05 g, 0.02 mmol) and [Zr(C<sub>5</sub>H<sub>5</sub>)<sub>2</sub>HCl] (0.04 g, 0.17 mmol), affording quantitatively **23** as yellow oil (0.088 g). <sup>1</sup>H-NMR(CDCl<sub>3</sub>):

$\delta$  6.67–6.60 (m, 6H, C<sub>6</sub>H<sub>3</sub>), 6.33 (s, 20H, C<sub>5</sub>H<sub>5</sub>), 3.82 (s, 6H, OMe), 2.51 (m, 4H, SiCH<sub>2</sub>CH<sub>2</sub>CH<sub>2</sub>Ph), 1.54 (m, 4H, SiCH<sub>2</sub>CH<sub>2</sub>CH<sub>2</sub>Ph), 1.29 (m, 6H, SiCH<sub>2</sub>CH<sub>2</sub>CH<sub>2</sub>Si), 0.52 (m, 16H, SiCH<sub>2</sub>CH<sub>2</sub>CH<sub>2</sub>Ph and SiCH<sub>2</sub>CH<sub>2</sub>CH<sub>2</sub>Si overlapping), -0.07 (s, 12H, SiMe<sub>2</sub>), -0.12 (s, 3H, SiMe). <sup>13</sup>C-NMR(CDCl<sub>3</sub>):  $\delta$  152.6 (C<sub>ipso</sub> bonded to -OZr), 147.9 (C<sub>ipso</sub> bonded to -OMe), 134.6 (C<sub>ipso</sub> bonded to -CH<sub>2</sub>), 120.5, 117.6 and 115.9 (C<sub>6</sub>H<sub>3</sub>), 114.4 (C<sub>5</sub>H<sub>5</sub>), 55.6 (OMe), 39.8 (SiCH<sub>2</sub>CH<sub>2</sub>CH<sub>2</sub>Ph), 26.4. (SiCH<sub>2</sub>CH<sub>2</sub>CH<sub>2</sub>Ph), 15.4 (SiCH<sub>2</sub>CH<sub>2</sub>CH<sub>2</sub>Ph), 20.7, 19.1, 17.7 and overlapped signals (Si(CH<sub>2</sub>)<sub>3</sub>Si), -2.9 (SiMe<sub>2</sub>), -4.6 (SiMe). <sup>29</sup>Si{<sup>1</sup>H} NMR (CDCl<sub>3</sub>):  $\delta$  1.86 (G2-Si), 1.19 (G1-Si) and 0.77 (G0-Si).  
 Anal. Calcd for C<sub>216</sub>H<sub>308</sub>Cl<sub>8</sub>O<sub>16</sub>Si<sub>13</sub>Zr<sub>8</sub>: C, 57.18; H, 6.79. Found: C, 56.92; H, 6.56.

#### **NMR data of -SiMe<sub>3</sub> protected phenols and phenol ended dendrimers.**

*See for example NMR data of: IIIa.* <sup>1</sup>H-NMR(CDCl<sub>3</sub>):  $\delta$  6.75 (m, 1H, C<sub>6</sub>H<sub>3</sub>), 6.65 (m, 2H, C<sub>6</sub>H<sub>3</sub>), 3.79 (s, 3H, OMe), 2.54 (t, 2H, SiCH<sub>2</sub>CH<sub>2</sub>CH<sub>2</sub>Ph), 1.58 (m, 2H, SiCH<sub>2</sub>CH<sub>2</sub>CH<sub>2</sub>Ph), 0.90 (t, 9H, SiCH<sub>2</sub>CH<sub>3</sub>), 0.50 (m, 8H, SiCH<sub>2</sub>CH<sub>3</sub> y SiCH<sub>2</sub>CH<sub>2</sub>CH<sub>2</sub>Ph overlapped), 0.22 (s, 9H, OSiMe<sub>3</sub>). *IIIb.* <sup>1</sup>H-NMR(CDCl<sub>3</sub>):  $\delta$  6.34 (s, 2H, C<sub>6</sub>H<sub>2</sub>), 3.78 (s, 6H, OMe), 2.53 (t, 2H, SiCH<sub>2</sub>CH<sub>2</sub>CH<sub>2</sub>Ph), 1.57 (m, 2H, SiCH<sub>2</sub>CH<sub>2</sub>CH<sub>2</sub>Ph), 0.89 (t, 9H, SiCH<sub>2</sub>CH<sub>3</sub>), 0.50 (m, 8H, SiCH<sub>2</sub>CH<sub>3</sub> y SiCH<sub>2</sub>CH<sub>2</sub>CH<sub>2</sub>Ph overlapped), 0.20 (s, 9H, OSiMe<sub>3</sub>). *Va.* <sup>1</sup>H-NMR(CDCl<sub>3</sub>):  $\delta$  6.72 (m, 1H, C<sub>6</sub>H<sub>3</sub>), 6.62 (m, 2H, C<sub>6</sub>H<sub>3</sub>), 3.77 (s, 3H, OMe), 2.52 (t, 2H, SiCH<sub>2</sub>CH<sub>2</sub>CH<sub>2</sub>Ph), 1.55 (m, 2H, SiCH<sub>2</sub>CH<sub>2</sub>CH<sub>2</sub>Ph), 1.29 (m, 2H, SiCH<sub>2</sub>CH<sub>2</sub>CH<sub>2</sub>Si), 0.52 (m broad, 6H, SiCH<sub>2</sub>CH<sub>2</sub>CH<sub>2</sub>Si y SiCH<sub>2</sub>CH<sub>2</sub>CH<sub>2</sub>Ph overlapped), 0.21 (s, 9H, OSiMe<sub>3</sub>) -0.07 (s, 6H, SiMe<sub>2</sub>). <sup>13</sup>C-NMR{<sup>1</sup>H} (CDCl<sub>3</sub>):  $\delta$  150.4 (C<sub>ipso</sub> bonded to -OSiMe<sub>3</sub>), 142.3 (C<sub>ipso</sub> bonded to -OMe), 136.4 (C<sub>ipso</sub> bonded to -CH<sub>2</sub>), 120.4, 120.3, 112.4, (C<sub>6</sub>H<sub>3</sub>), 55.5 (OMe), 39.8 (SiCH<sub>2</sub>CH<sub>2</sub>CH<sub>2</sub>Ph), 26.3 (SiCH<sub>2</sub>CH<sub>2</sub>CH<sub>2</sub>Ph), 15.5 (SiCH<sub>2</sub>CH<sub>2</sub>CH<sub>2</sub>Ph), 20.4, 18.6, 17.6 (Si(CH<sub>2</sub>)<sub>3</sub>Si), 0.40 (OSiMe<sub>3</sub>), -3.2 (SiMe<sub>2</sub>). *VIa:* <sup>1</sup>H-NMR (CDCl<sub>3</sub>):  $\delta$  6.72 (m, 2H, C<sub>6</sub>H<sub>3</sub>), 6.62 (m, 4H, C<sub>6</sub>H<sub>3</sub>), 3.77 (s, 6H, OMe), 2.52 (t, 4H, SiCH<sub>2</sub>CH<sub>2</sub>CH<sub>2</sub>Ph), 1.55 (m, 4H, SiCH<sub>2</sub>CH<sub>2</sub>CH<sub>2</sub>Ph), 1.29 (m, 6H,

SiCH<sub>2</sub>CH<sub>2</sub>CH<sub>2</sub>Si), 0.52 (m broad, 16H, SiCH<sub>2</sub>CH<sub>2</sub>CH<sub>2</sub>Si y SiCH<sub>2</sub>CH<sub>2</sub>CH<sub>2</sub>Ph overlapped), 0.21 (s, 18H, OSiMe<sub>3</sub>), -0.07 (s, 12H, SiMe<sub>2</sub>), -0.10 (s, 3H, SiMe). <sup>13</sup>C-NMR{<sup>1</sup>H} (CDCl<sub>3</sub>): δ 150.5 (C<sub>ipso</sub> bonded to -OSiMe<sub>3</sub>), 142.4 (C<sub>ipso</sub> bonded to -OMe), 136.4 (C<sub>ipso</sub> bonded to -CH<sub>2</sub>), 120.5, 120.4, 112.4 (C<sub>6</sub>H<sub>3</sub>), 55.5 (OMe), 39.8 (SiCH<sub>2</sub>CH<sub>2</sub>CH<sub>2</sub>Ph), 26.2 (SiCH<sub>2</sub>CH<sub>2</sub>CH<sub>2</sub>Ph), 15.4 (SiCH<sub>2</sub>CH<sub>2</sub>CH<sub>2</sub>Ph), 20.2, 18.8, 18.5 and overlapped signals (Si(CH<sub>2</sub>)<sub>3</sub>Si), 0.30 (OSiMe<sub>3</sub>), -3.2 (SiMe<sub>2</sub>), -4.9 (SiMe).

### Crystal structure determinations of 2

Red crystals of compound 2 were obtained from a mixture of Et<sub>2</sub>O/hexane cooled at -20°C and a suitable sized crystal was mounted in a Lindemann tube and mounted in an Enraf-Nonius CAD 4 automatic four-circle diffractometer with graphite monochromated MoKα radiation (λ=0.71073 Å). Crystallographic and experimental details are summarized in Table 2. Data were collected at room temperature. Intensities were corrected for Lorentz and polarization effects in the usual manner. No absorption or extinction corrections were made. The structure was solved using the WINGX package<sup>#1</sup> by direct methods (SHELXS 97) and refined by least squares against F<sup>2</sup> (SHELXL 97)<sup>#2</sup>. All non hydrogen atoms were refined anisotropically, and the hydrogen atoms were introduced from geometrical calculations and refined using a riding model with thermal parameters equivalent to those of the carbon atom to which they were attached.

(#1): Farrugia, L.J., *J. Appl. Crystallgr.* **1999**, 32, 837. (#2) Sheldrick, G.M. SHELX-97; Program for Crystal Structure Analyses (Release 97-2); Universität Göttingen, Göttingen, Germany, **1998**.

# $^1\text{H}$ -NMR

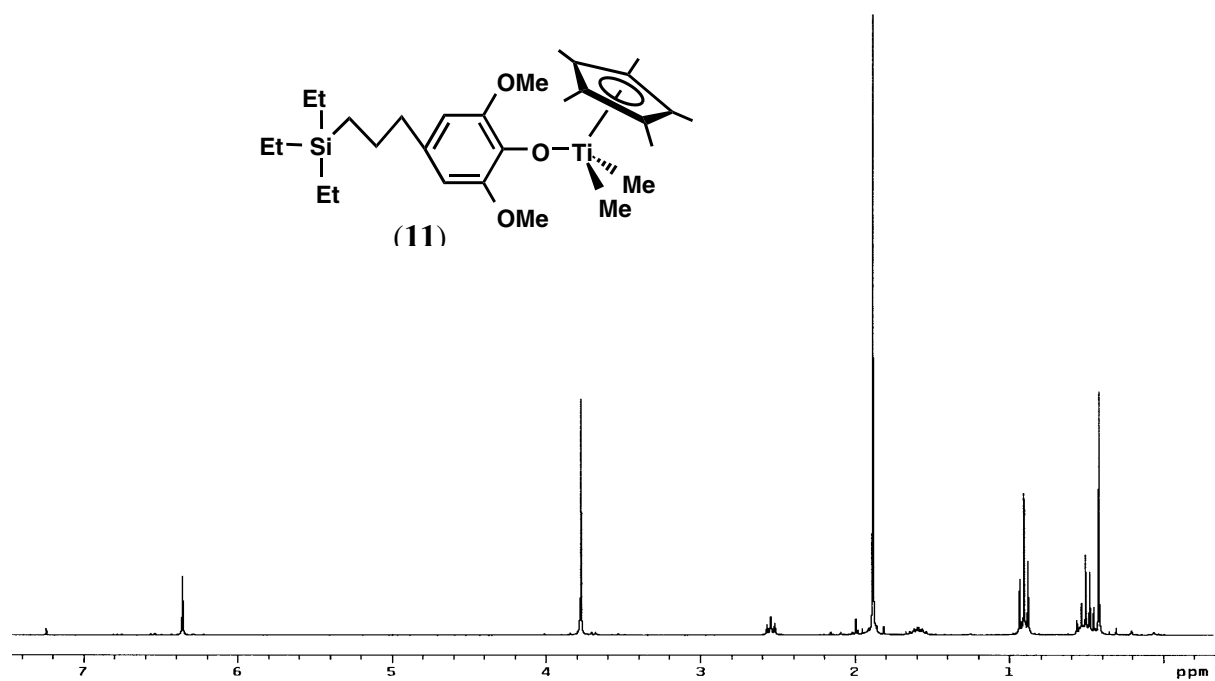

# $^{13}\text{C}\{^1\text{H}\}$ -NMR

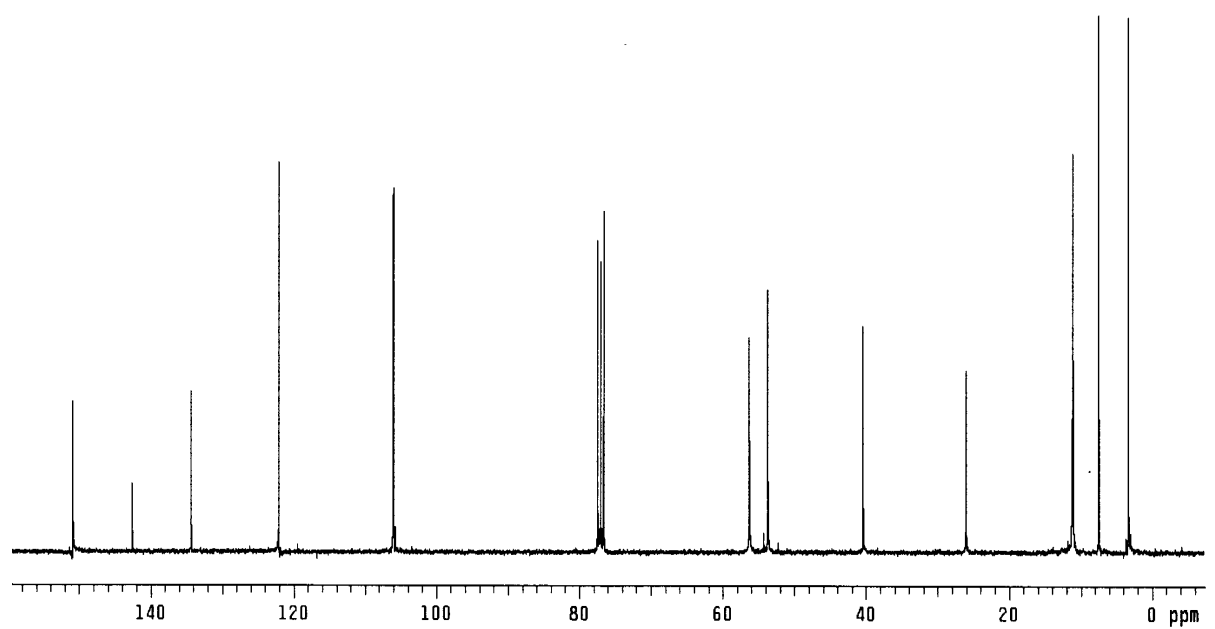



# $^1\text{H}$ -NMR

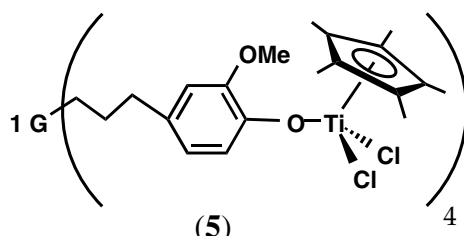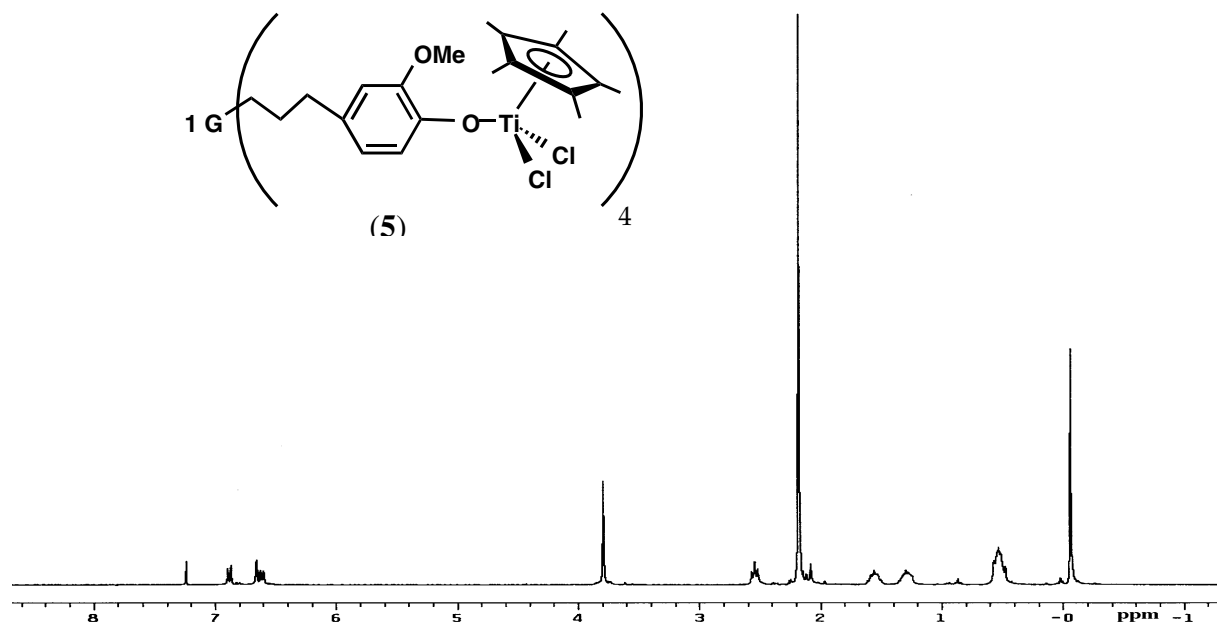

# $^{13}\text{C}\{^1\text{H}\}$ -NMR

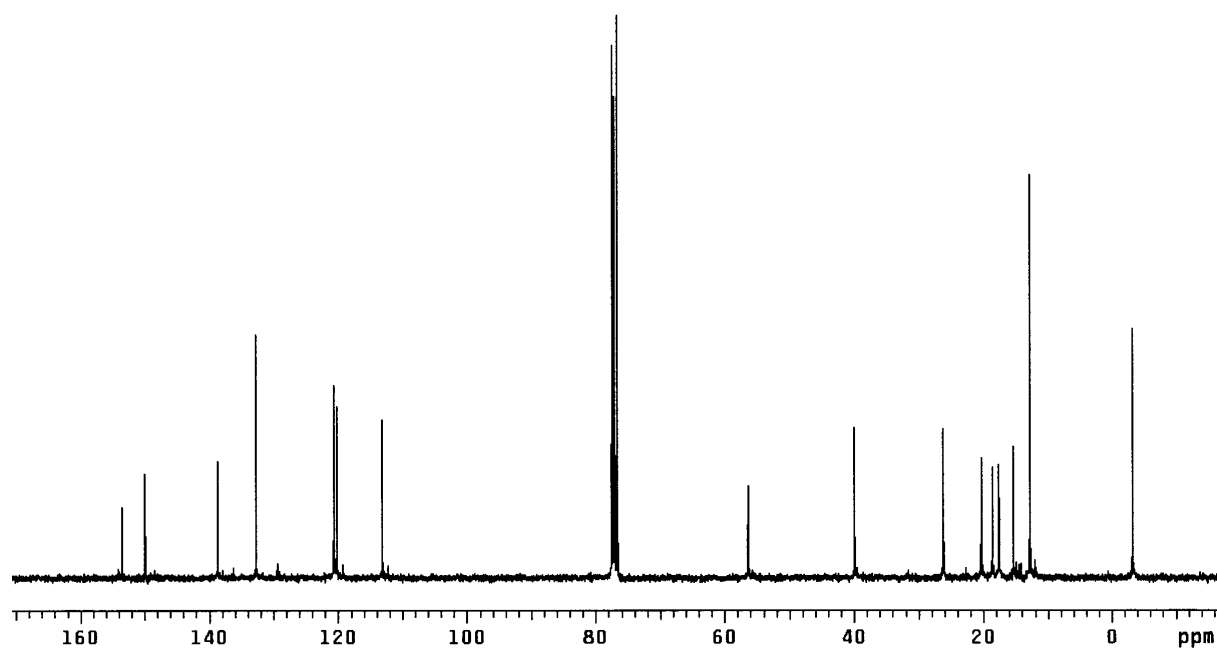

# $^1\text{H}$ -NMR

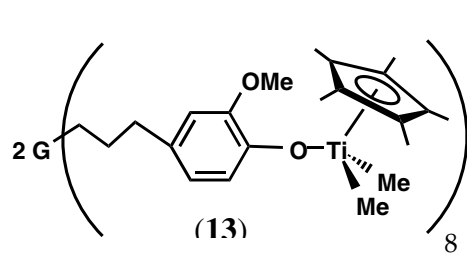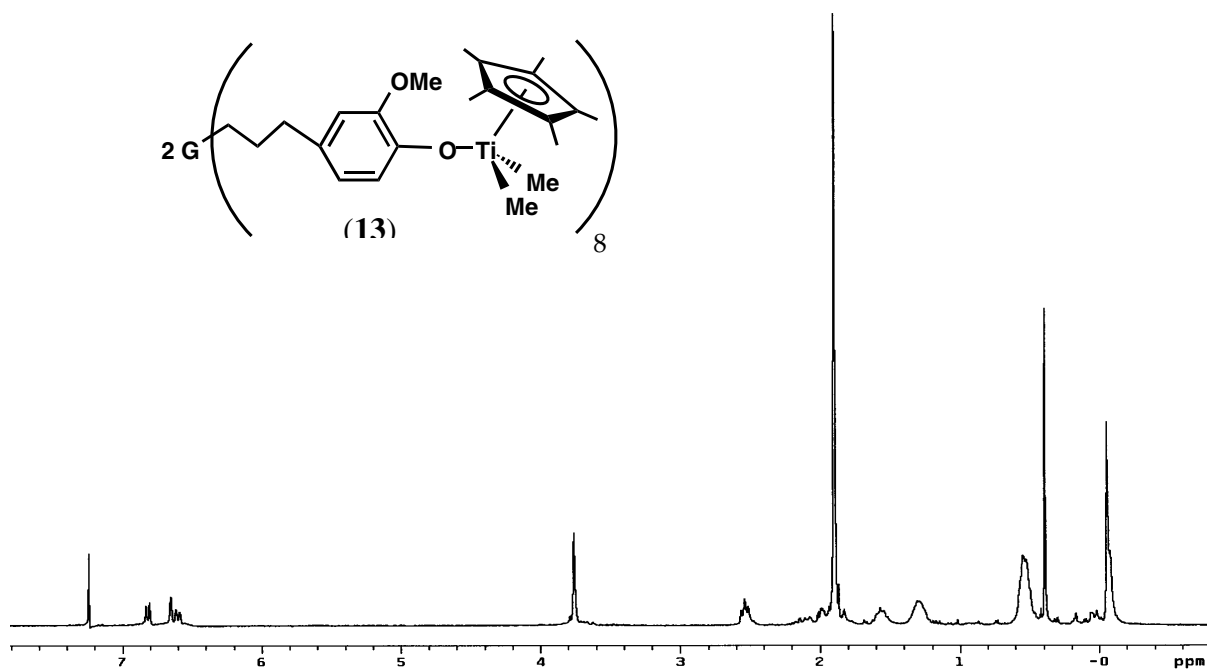

# $^{13}\text{C}\{^1\text{H}\}$ -NMR

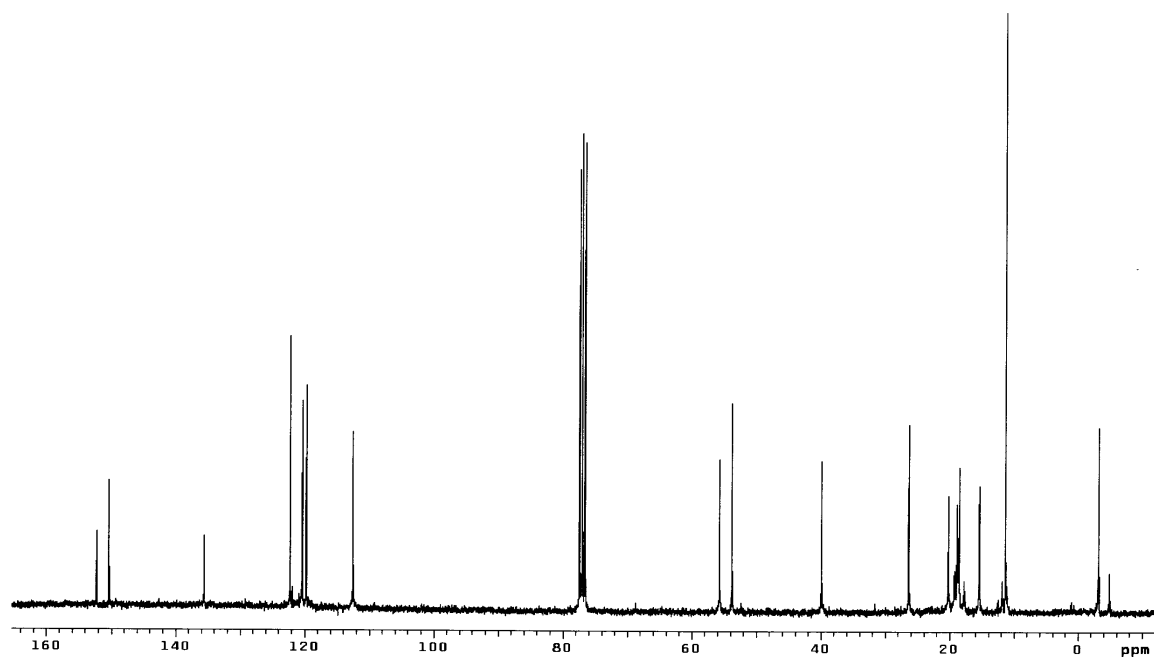

# $^1\text{H}$ -NMR

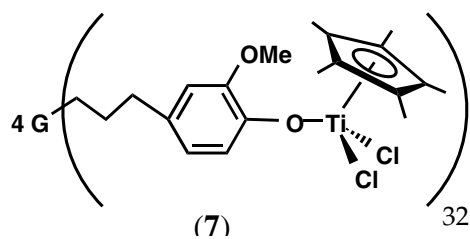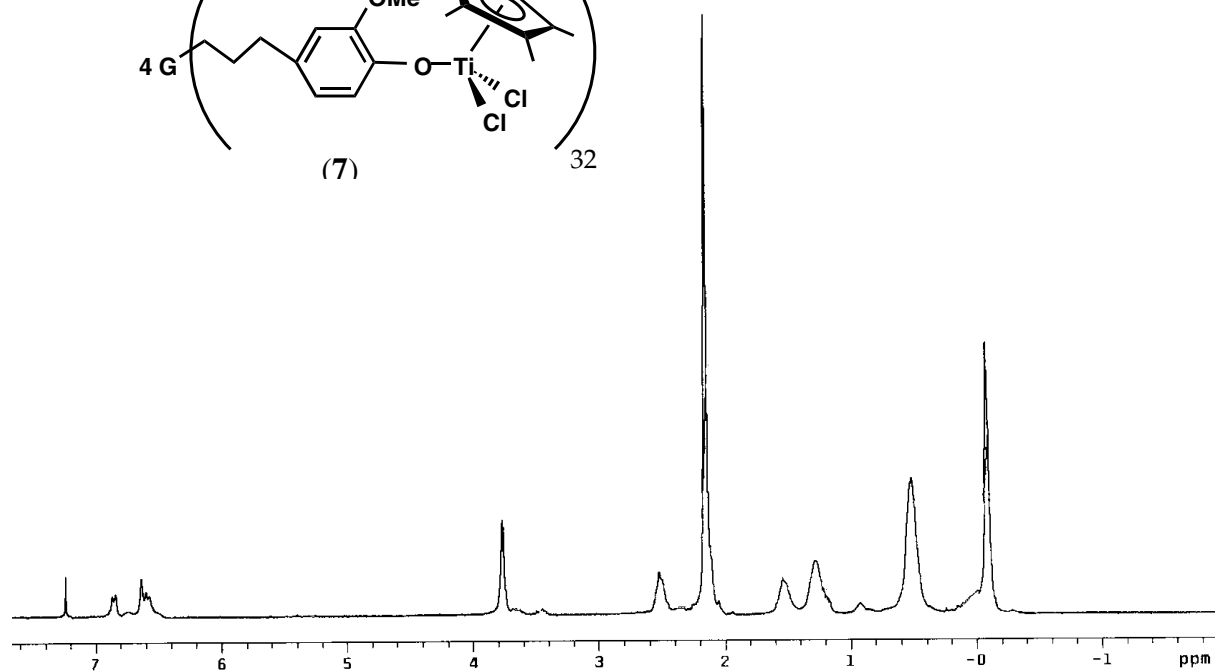

# $^{13}\text{C}\{^1\text{H}\}$ -NMR

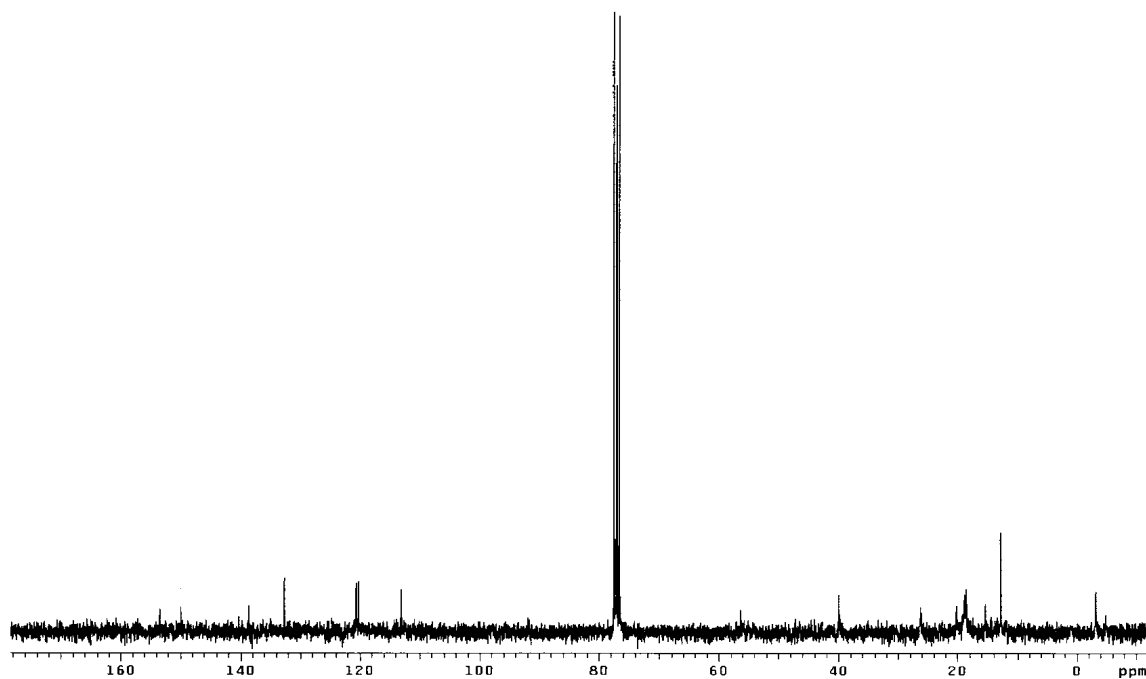

# $^1\text{H}$ -NMR

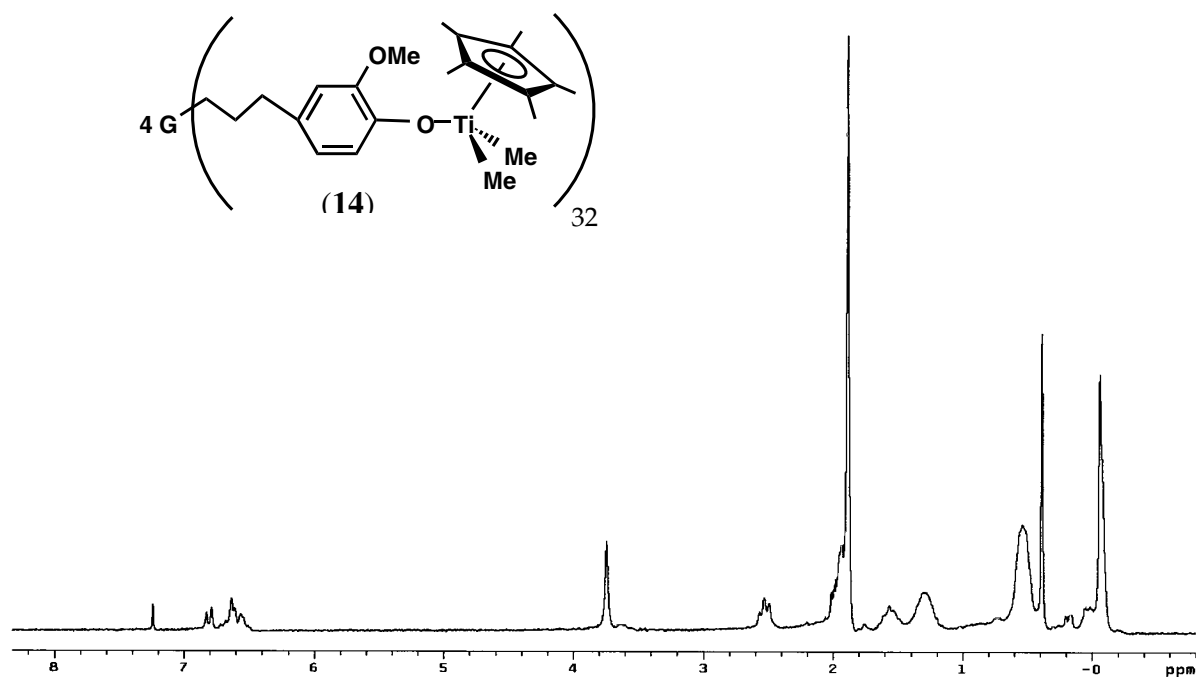

# $^{13}\text{C}\{^1\text{H}\}$ -NMR

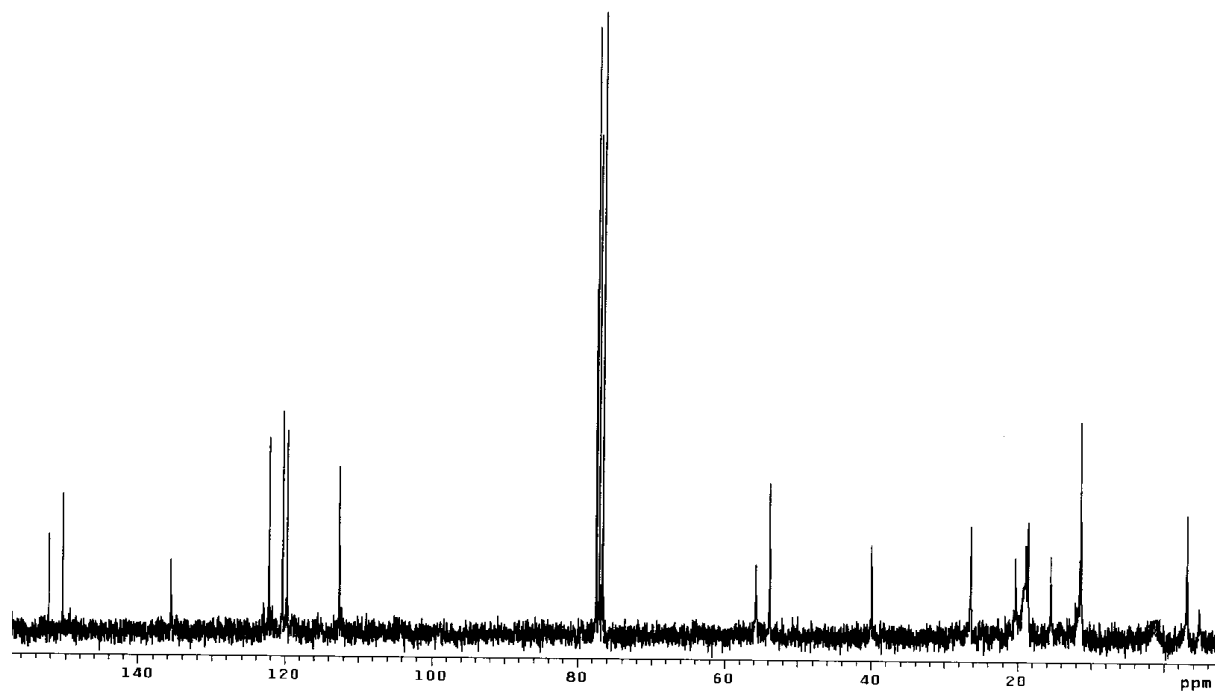

# $^1\text{H}$ -NMR

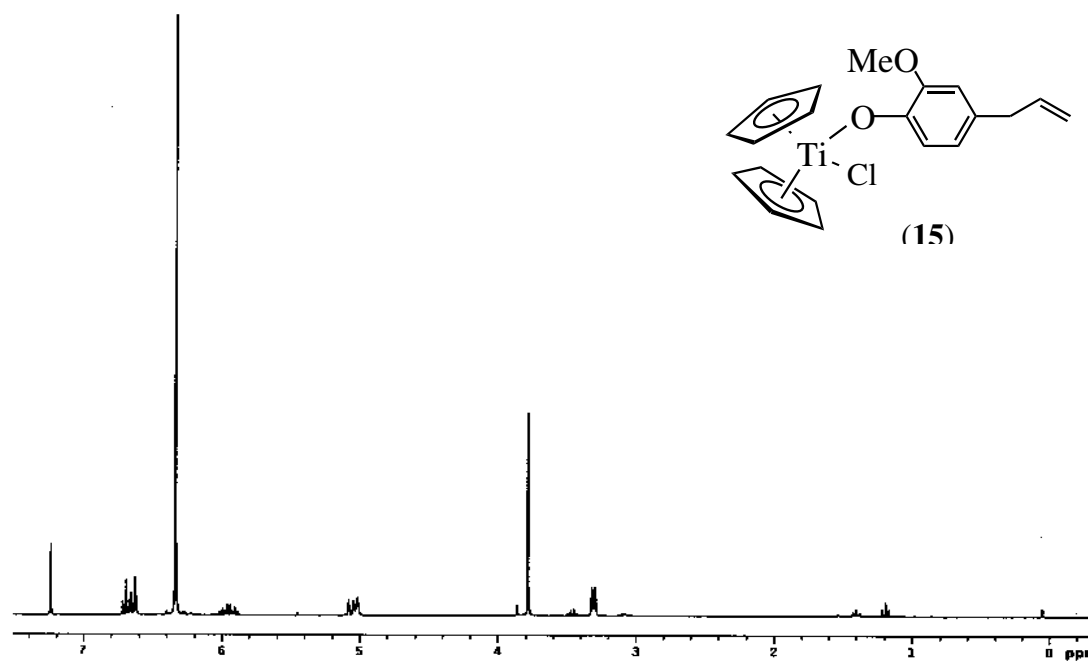

# $^{13}\text{C}\{^1\text{H}\}$ -NMR

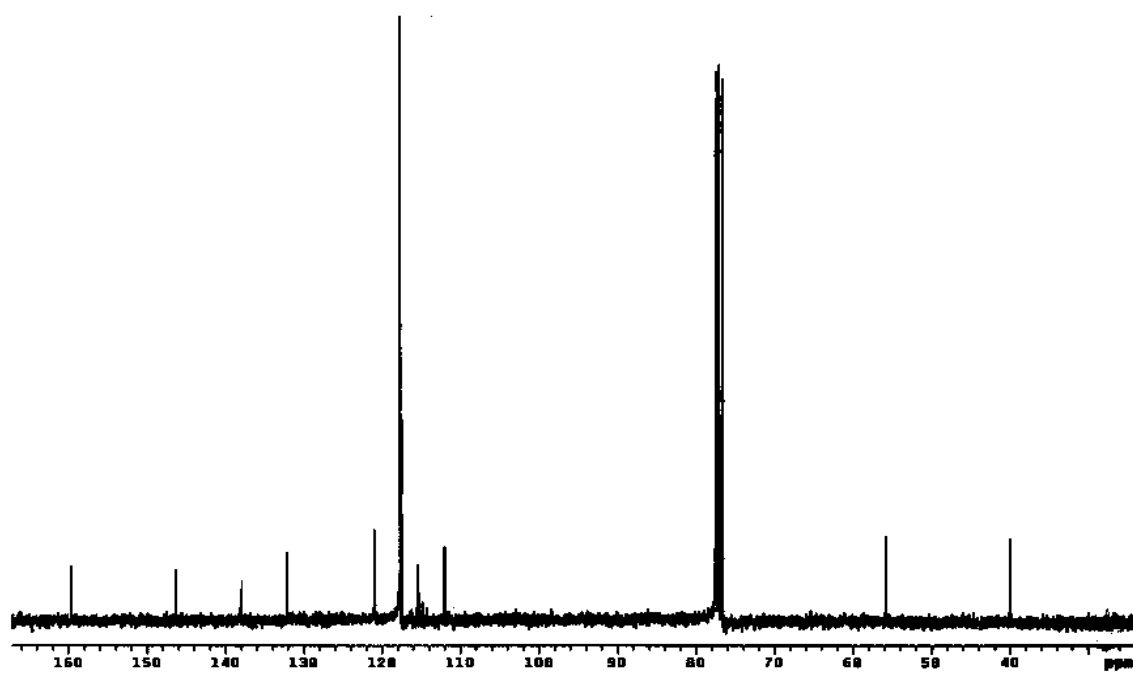

$^1\text{H}$ -NMR

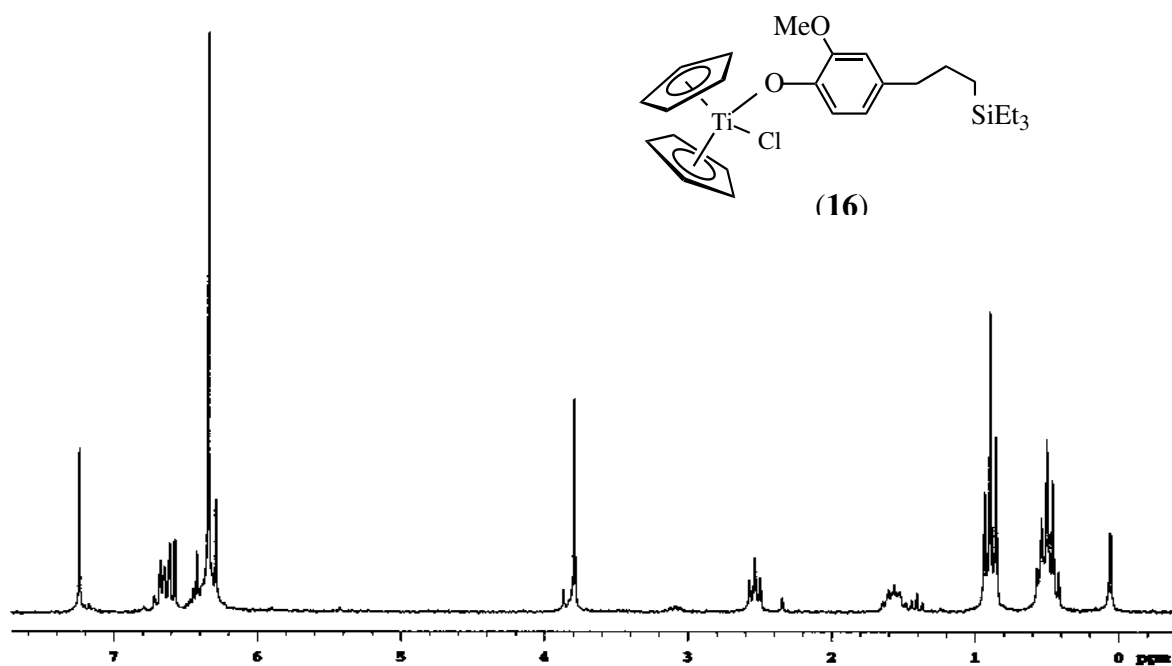

$^{13}\text{C}\{^1\text{H}\}$ -NMR

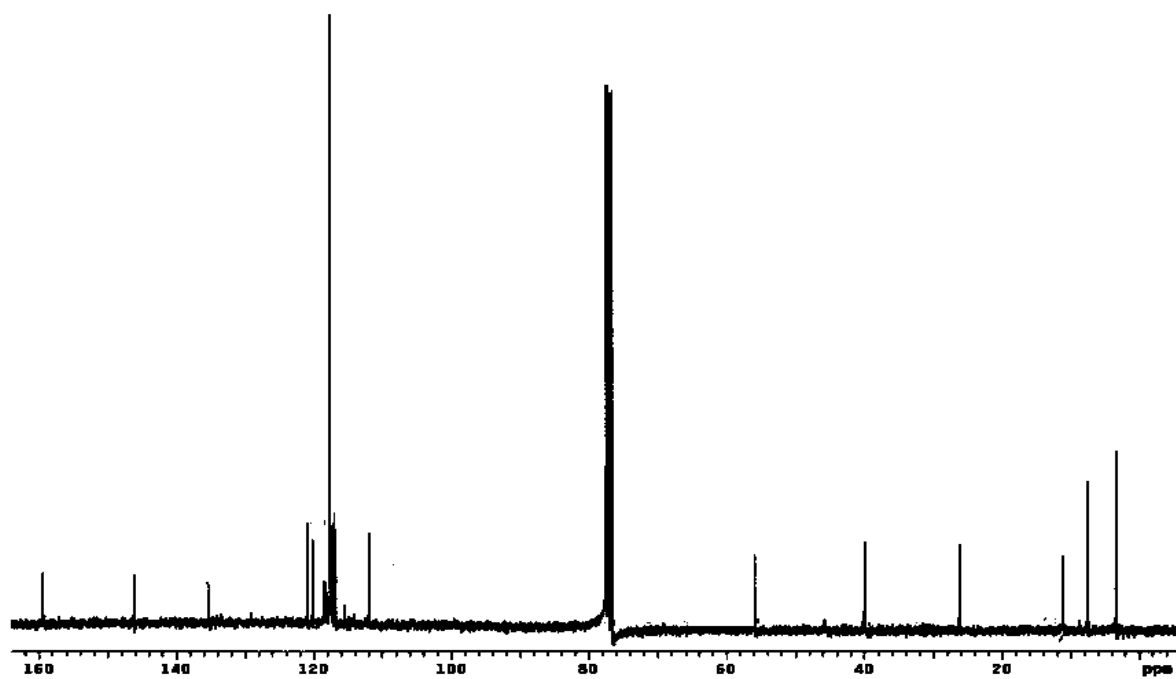

**$^1\text{H}$ -NMR**

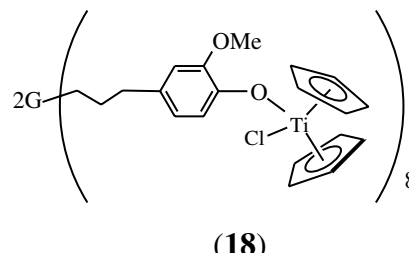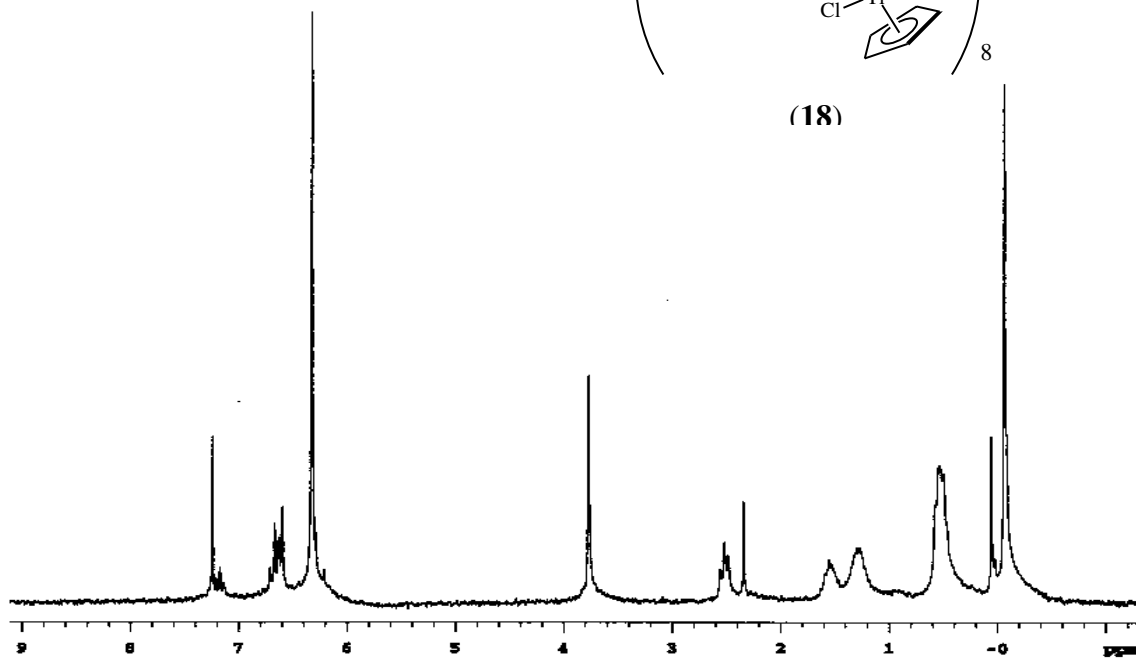

**$^{13}\text{C}\{^1\text{H}\}$ -NMR**

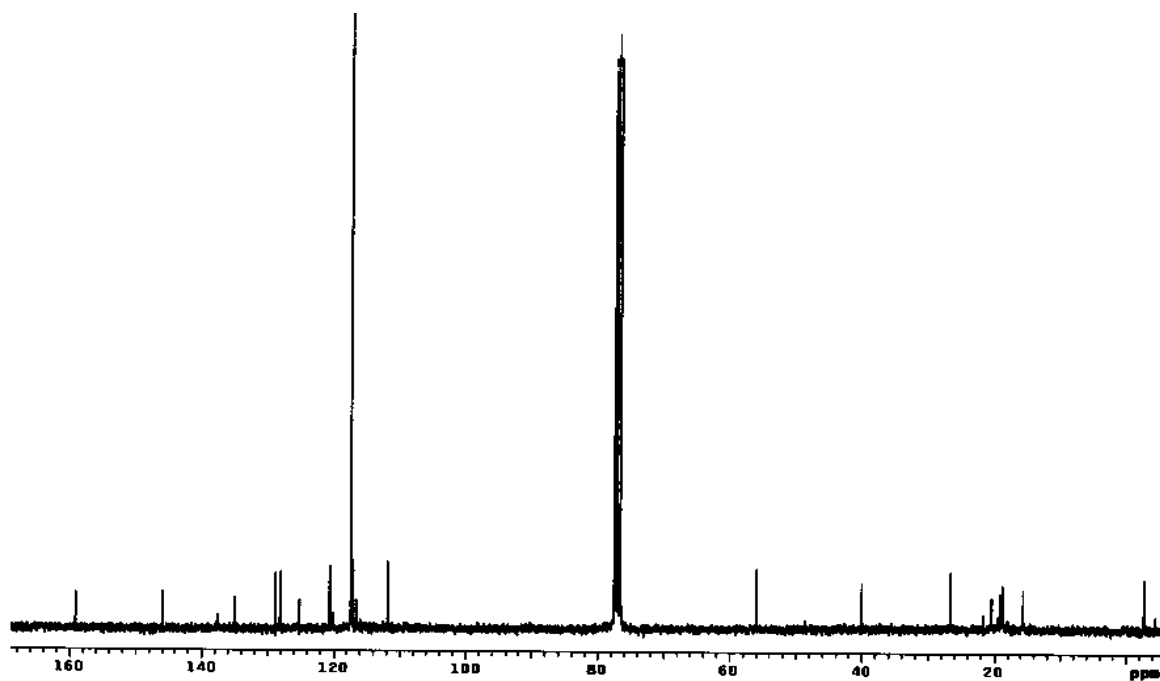

# $^1\text{H}$ -NMR

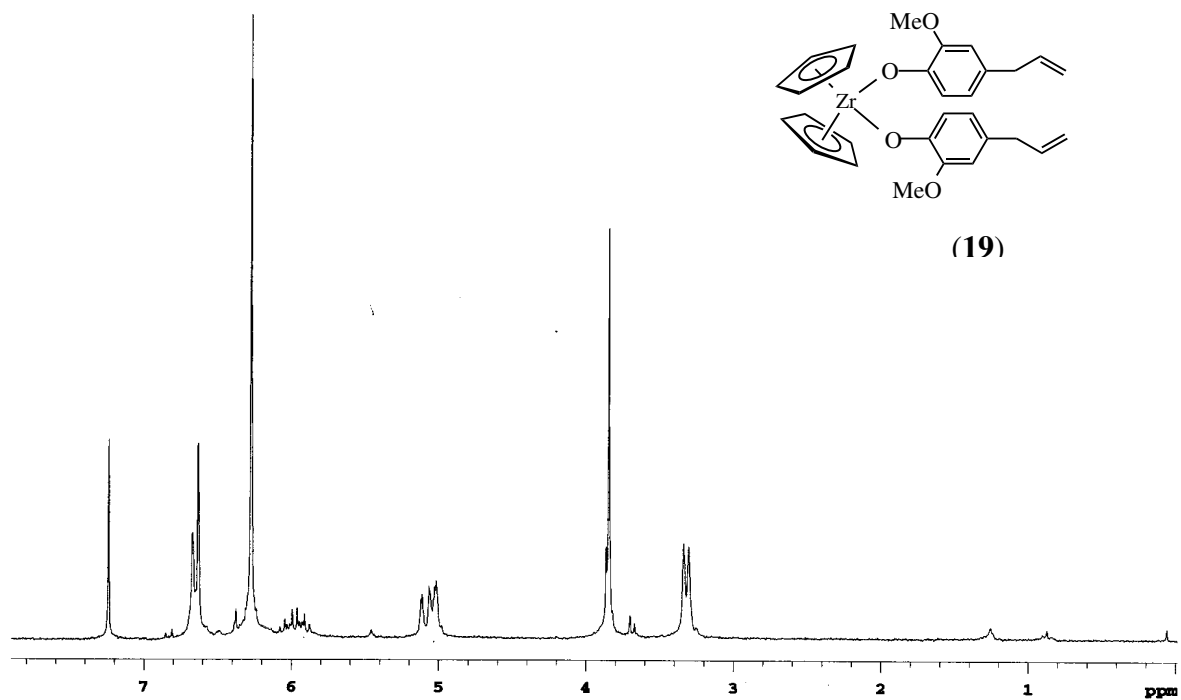

# $^{13}\text{C}\{\text{H}\}$ -NMR

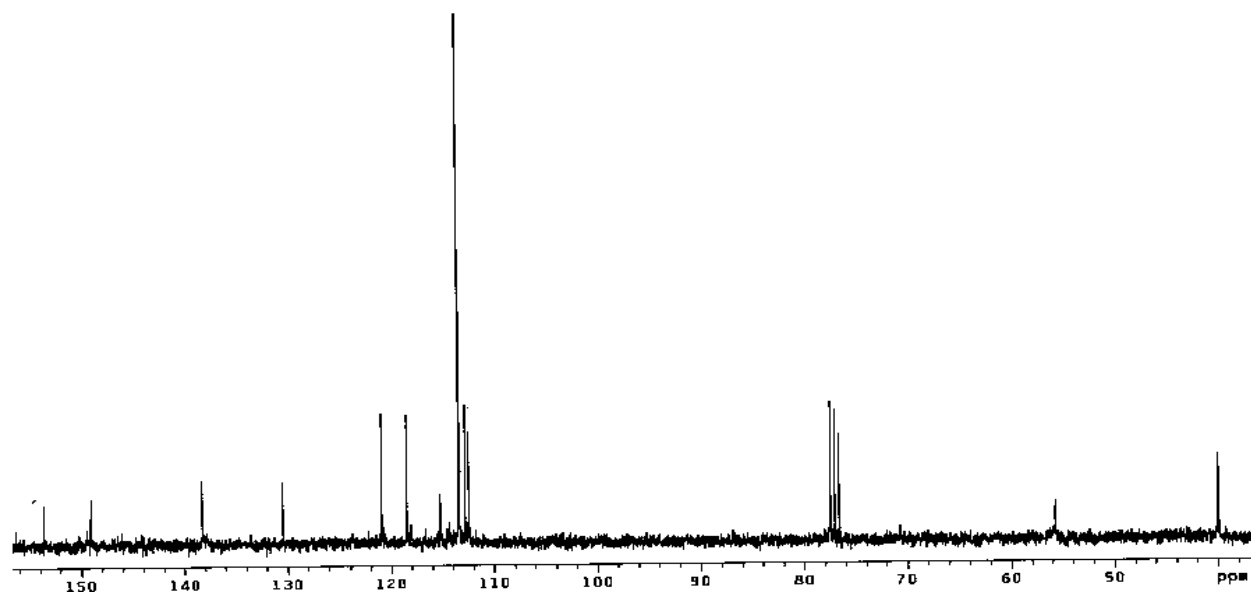



# $^1\text{H}$ -NMR

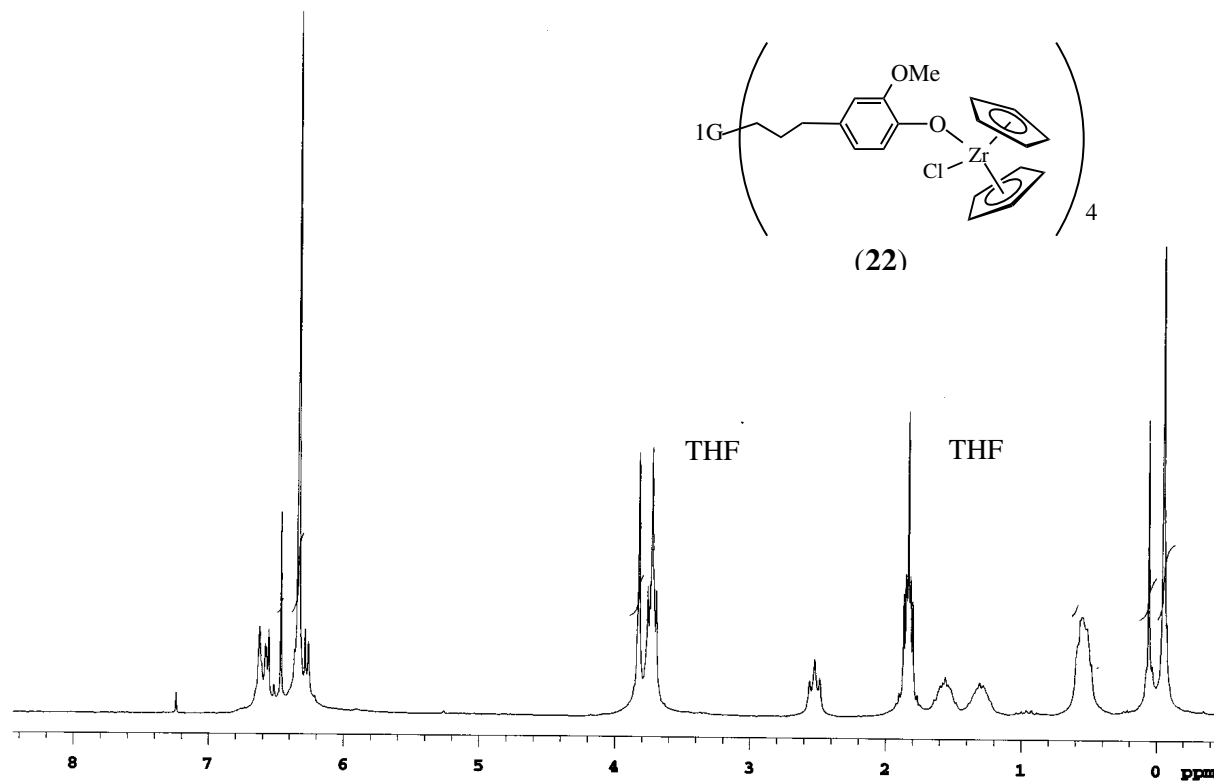

# $^{13}\text{C}\{\text{H}\}$ -NMR

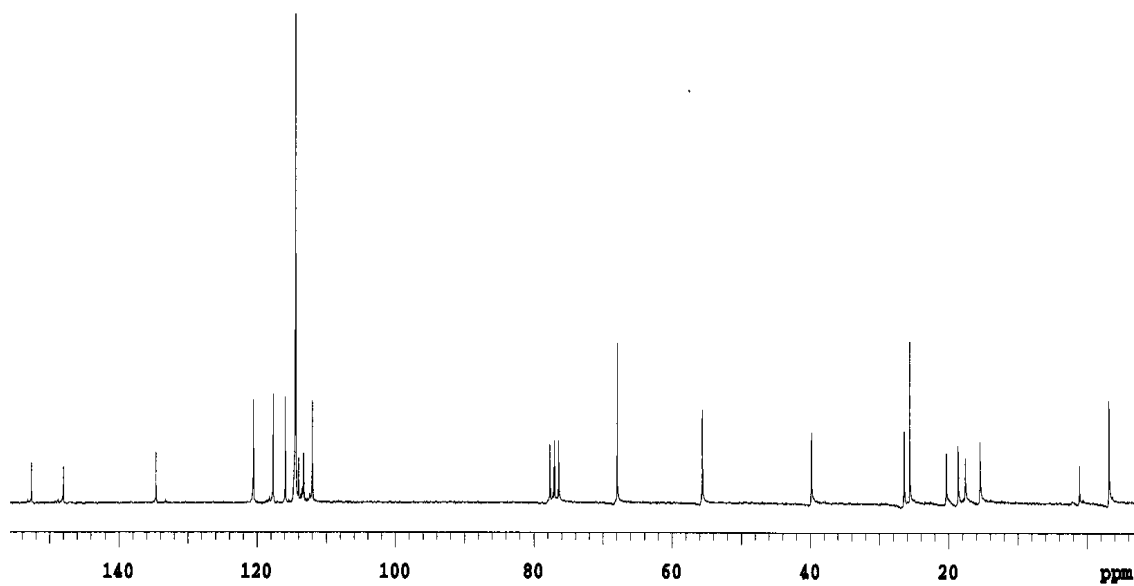

$^{29}\text{Si}$ -RMN

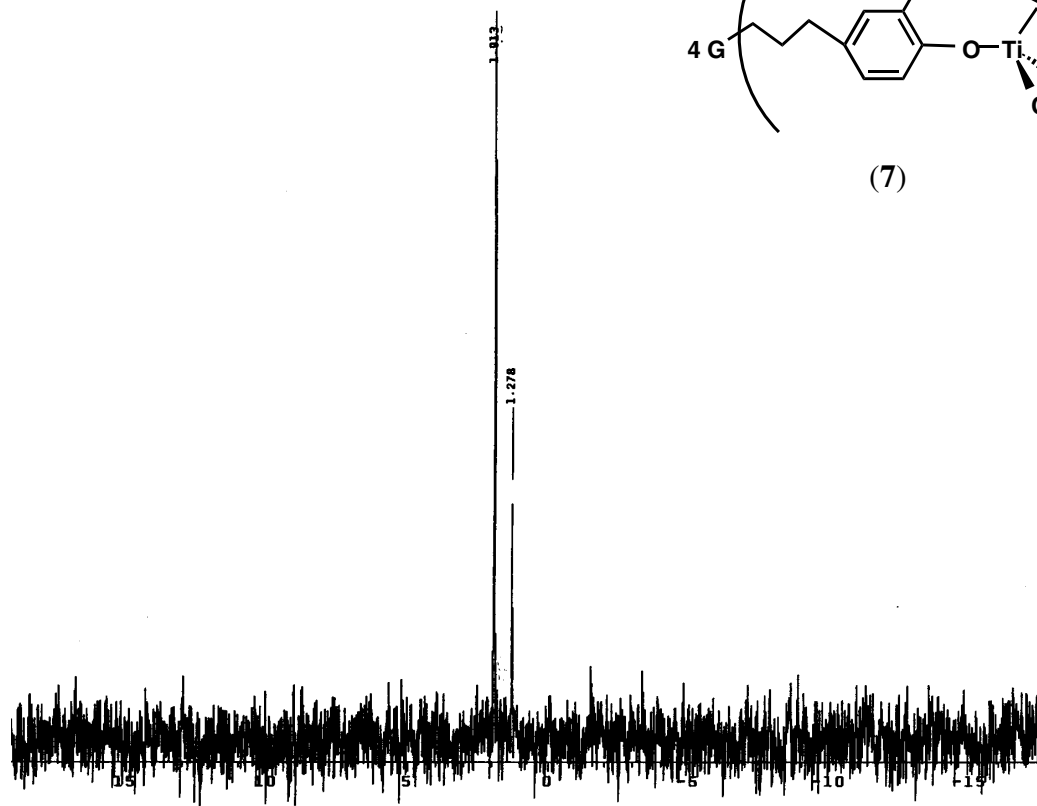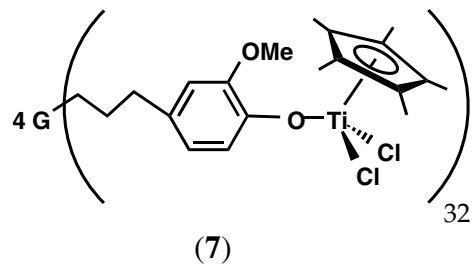

$^{29}\text{Si}$ -RMN

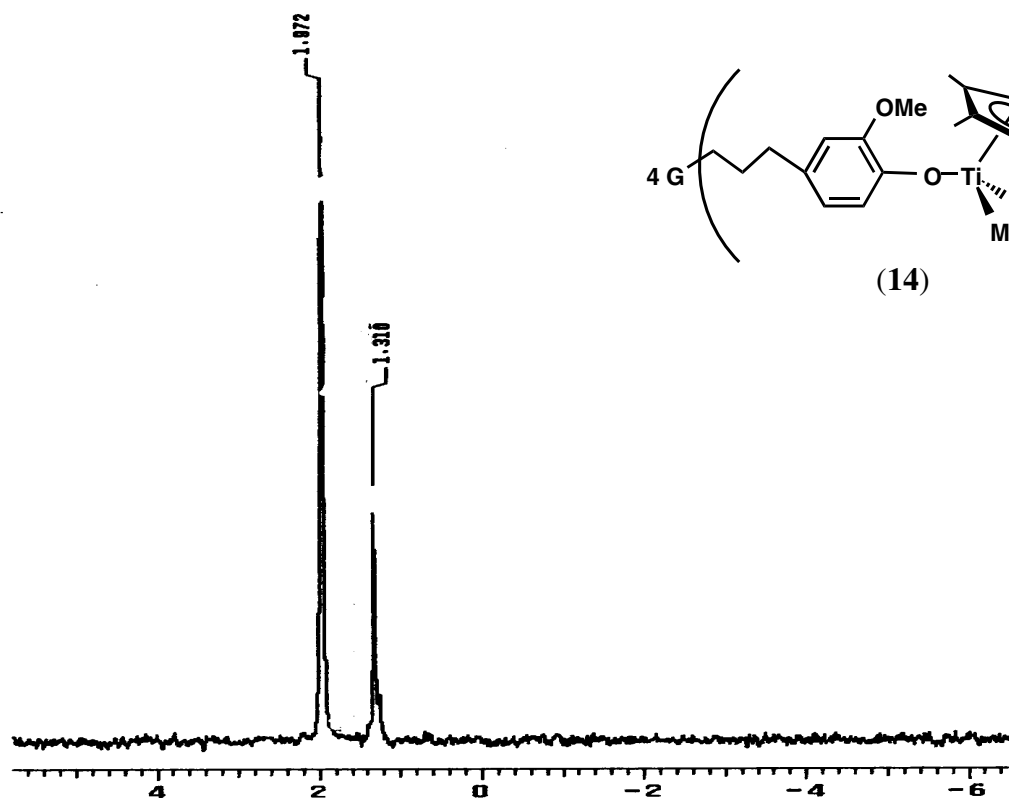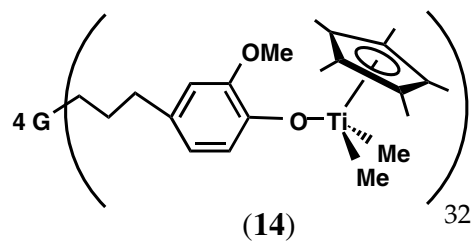

<sup>29</sup>Si-RMN

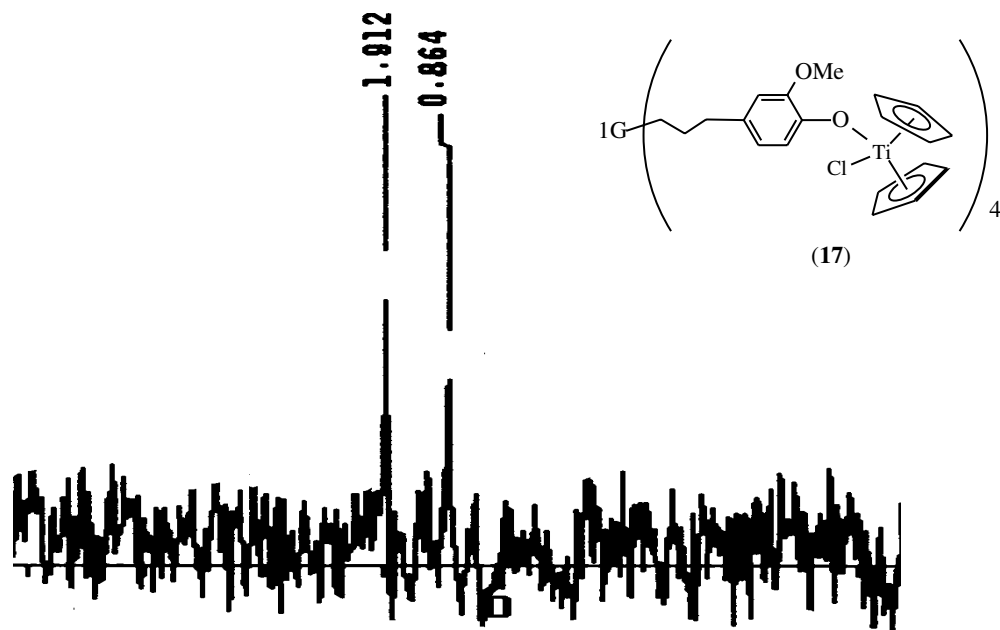

<sup>29</sup>Si-RMN

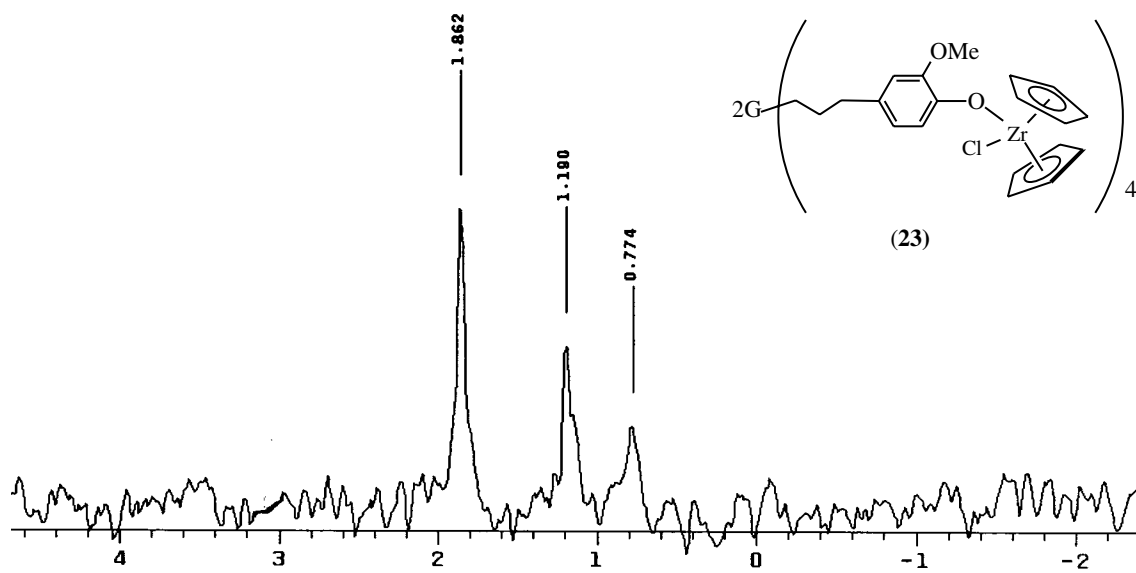

**Table 1. Bond lengths [Å] and angles [°] for compound 2.**

|                   |            |                   |           |
|-------------------|------------|-------------------|-----------|
| Ti(1)-O(1)        | 1.770(3)   | C(22)-O(2)        | 1.348(7)  |
| Ti(1)-Cl(2)       | 2.2638(18) | O(2)-C(43)        | 1.438(7)  |
| Ti(1)-Cl(1)       | 2.2661(18) | O(3)-C(44)        | 1.417(8)  |
| O(1)-C(21)        | 1.363(6)   | C(31)-C(32)       | 1.433(10) |
| C(26)-O(3)        | 1.375(6)   | C(32)-C(33)       | 1.277(10) |
| C(24)-C(31)       | 1.543(8)   | Cp(1)-Ti(1)       | 2.026     |
|                   |            |                   |           |
| O(1)-Ti(1)-Cl(2)  | 104.35(14) | O(2)-C(22)-C(23)  | 125.8(6)  |
| O(1)-Ti(1)-Cl(1)  | 102.50(13) | O(2)-C(22)-C(21)  | 115.4(5)  |
| Cl(2)-Ti(1)-Cl(1) | 100.31(8)  | C(22)-O(2)-C(43)  | 116.6(5)  |
| C(21)-O(1)-Ti(1)  | 163.1(3)   | C(26)-O(3)-C(44)  | 117.8(5)  |
| O(1)-C(21)-C(26)  | 120.7(5)   | C(32)-C(31)-C(24) | 116.9(7)  |
| O(1)-C(21)-C(22)  | 119.6(5)   | C(33)-C(32)-C(31) | 130.4(9)  |
| C(25)-C(26)-O(3)  | 125.8(6)   | Cp(1)-Ti(1)-O(1)  | 118.9     |
| O(3)-C(26)-C(21)  | 114.2(5)   | Cp(1)-Ti(1)-Cl(1) | 114.5     |
| C(25)-C(24)-C(31) | 120.7(6)   | Cp(1)-Ti(1)-Cl(2) | 113.8     |
| C(23)-C(24)-C(31) | 119.3(6)   | Ti(1)-O(1)-C(21)  | 163.1(3)  |

Cp(1) is the centroid of C(1), C(2),C(3),C(4),C(5).

**Table 2. Crystal data and structure refinement for compound 2.**

|                                                    |                                                                   |
|----------------------------------------------------|-------------------------------------------------------------------|
| Empirical formula                                  | C <sub>21</sub> H <sub>28</sub> Cl <sub>2</sub> O <sub>3</sub> Ti |
| Formula weight                                     | 447.23                                                            |
| Temperature                                        | 293(2) K                                                          |
| Wavelength                                         | 0.71073 Å                                                         |
| Crystal system                                     | Monoclinic                                                        |
| Space group                                        | C2/c                                                              |
| Unit cell dimensions                               | $a = 30.543(2)$ Å<br>$b = 9.5370(10)$ Å<br>$c = 16.588(2)$ Å      |
|                                                    | $\beta = 112.41(2)^\circ$                                         |
| Volume                                             | $4467.0(8)$ Å <sup>3</sup>                                        |
| Z                                                  | 8                                                                 |
| Density (calculated)                               | 1.330 Mg/m <sup>3</sup>                                           |
| Absorption coefficient                             | 0.640 mm <sup>-1</sup>                                            |
| $F(000)$                                           | 1872                                                              |
| Crystal size                                       | $0.35 \times 0.30 \times 0.15$ mm <sup>3</sup>                    |
| $\theta$ range for data collection                 | 2.25 to 25.00°                                                    |
| Index ranges                                       | $-36 \leq h \leq 33$ , $0 \leq k \leq 11$ , $0 \leq l \leq 19$    |
| Reflections collected                              | 4065                                                              |
| Independent reflections                            | 3912 [ $R(\text{int}) = 0.0312$ ]                                 |
| Completeness to $\theta = 25.00^\circ$             | 99.8 %                                                            |
| Absorption correction                              | None                                                              |
| Refinement method                                  | Full-matrix least-squares on $F^2$                                |
| Data / restraints / parameters                     | 3912 / 0 / 239                                                    |
| Goodness-of-fit on $F^2$                           | 0.998                                                             |
| Final $R$ indices [ $I > \sigma(I)$ ] <sup>a</sup> | $R1 = 0.0606$ , $wR2 = 0.1308$                                    |
| $R$ indices (all data)                             | $R1 = 0.1587$ , $wR2 = 0.1619$                                    |
| Largest diff. peak and hole                        | 0.517 and -0.342 e Å <sup>-3</sup>                                |

$$^a R1 = \Sigma ||F_o| - |F_c|| / \Sigma |F_o|; \quad wR2 = \{ [\Sigma w(F_o^2 - F_c^2)^2] / [\Sigma w(F_o^2)^2] \}^{1/2}.$$
